# Supplementary material for: Next Generation Sequencing Provides Rapid Access to the Genome of Puccinia striiformis f. sp. tritici, the Causal Agent of Wheat Stripe Rust
Source: PLoS One. 2011 Aug 31;6(8):e24230. doi: 10.1371/journal.pone.0024230 (PMC3164196; doi:10.1371/journal.pone.0024230)
Supplement: Material S3 — 20,423 predicted PST-130 proteins with pfam accession numbers and names ( http://pfam.sanger.ac.uk/ ), GO descriptions ( http://www.blast2go.org/ ) and the most similar PGTG protein accessions and annotations (BLASTP, E-value ≤e−5). (XLSX) [file pone.0024230.s009.xlsx]

## Sheet: Supplementary material S4
PST130	pfam hmm acc	pfam hmm name	pfam-E-value	GOSlim-ID (Blast2GO)	Putative Anntotation (Blast2GO)	PST_HAUSTORIA_EST(GB)	BEST_PGTG_BLASTP_HIT (BLASTP)	PGTG_Evalue (BLASTP)	PGTG ANNOTATION
PST130_10001_1	PF00076.16	RRM_1	4.3e-18				9843	1e-66	hypothetical protein similar to RNA recognition domain-containing protein family protein (264 aa)
PST130_10001_2	PF00071.16	Ras	4.3e-61	GO:0006810 GO:0003674 GO:0007165	rab gtpase		9844	1e-87	hypothetical protein similar to RAB5C (191 aa)
PST130_10001_3
PST130_10001_5	PF00621.14	RhoGEF	1.5e-21				9846	0	hypothetical protein similar to FGD3 protein (913 aa)
PST130_10001_7							9847	4e-15	predicted protein (441 aa)
PST130_10001_8							9847	3e-88	predicted protein (441 aa)
PST130_10002_1							5229	3e-14	predicted protein (229 aa)
PST130_10003_1							13061	2e-19	hypothetical protein similar to pantothenate kinase (618 aa)
PST130_10003_2
PST130_10004_3	PF10551.3	MULE	2.6e-17				34	1e-64	predicted protein (360 aa)
PST130_10006_1							17238	6e-32	predicted protein (693 aa)
PST130_10006_2	PF00160.15	Pro_isomerase	2.5e-38				17243	2e-90	peptidyl-prolyl cis-trans isomerase (361 aa)
PST130_10007_1	PF00344.14	SecY	2.2e-05	GO:0005515 GO:0005215 GO:0006810 GO:0016020	protein transport protein sec61 subunit alpha		9138	8e-12	protein transport protein SEC61 subunit alpha (413 aa)
PST130_10007_10
PST130_10007_7	PF00856.22	SET	3.7e-08				2217	8e-78	predicted protein (503 aa)
PST130_10007_8	PF00022.13	Actin	1.9e-117	GO:0005515	actin binding		2218	0	actin (402 aa)
PST130_10007_9							8799	3e-164	predicted protein (752 aa)
PST130_10008_2							10888	3e-27	predicted protein (406 aa)
PST130_10008_3	PF04227.6	Indigoidine_A	3.5e-65				18917	0	hypothetical protein (718 aa)
PST130_10009_2							17107	1e-14	predicted protein (706 aa)
PST130_10009_4	PF03184.13	DDE_1	0.00081				11188	1e-19	predicted protein (284 aa)
PST130_10010_1
PST130_10010_2	PF02469.16	Fasciclin	1.6e-07				5076	0	hypothetical protein (459 aa)
PST130_10012_1
PST130_10012_3
PST130_10013_2							8353	4e-54	predicted protein (742 aa)
PST130_10013_3
PST130_10014_3							19745	1e-26	predicted protein (980 aa)
PST130_10014_4							4111	8e-46	predicted protein (948 aa)
PST130_10015_1							15628	7e-14	hypothetical protein (177 aa)
PST130_10016_2
PST130_10016_3	PF12928.1	tRNA_int_end_N2	5.6e-11	GO:0005575	sen54_schpo ame: full=probable trna-splicing endonuclease subunit sen54 ame: full=trna-intron endonuclease sen54		19748	2e-61	conserved hypothetical protein (481 aa)
PST130_10017_1
PST130_10018_1	PF00675.14	Peptidase_M16	2.8e-06				14840	7e-176	conserved hypothetical protein (1018 aa)
PST130_10018_2
PST130_10019_2
PST130_10019_6							1798	4e-08	predicted protein (120 aa)
PST130_10019_7	PF00096.20	zf-C2H2	0.00011				1797	3e-51	predicted protein (231 aa)
PST130_10020_3							8353	2e-61	predicted protein (742 aa)
PST130_10020_5
PST130_10020_6	PF02854.13	MIF4G	8.7e-22	GO:0005737 GO:0016070 GO:0005634 GO:0005515	pre-mrna-splicing factor cwc22		17879	8e-171	pre-mRNA-splicing factor CWC22 (872 aa)
PST130_10021_2
PST130_10021_6							7583	3e-118	predicted protein (796 aa)
PST130_10022_1							14471	2e-57	predicted protein (346 aa)
PST130_10023_2	PF05648.8	PEX11	0.004				14615	3e-61	hypothetical protein (258 aa)
PST130_10023_3						GH737130.1
PST130_10023_4
PST130_10024_2
PST130_10024_3	PF09848.3	DUF2075	0.0036				2240	1e-142	conserved hypothetical protein (643 aa)
PST130_10024_4
PST130_10025_1							15125	2e-78	predicted protein (589 aa)
PST130_10025_2							19423	8e-167	hypothetical protein similar to reverse transcriptase/ribonuclease H (518 aa)
PST130_10026_3							105	1e-33	predicted protein (782 aa)
PST130_10026_4							3499	3e-08	predicted protein (384 aa)
PST130_10028_2							12867	7e-48	predicted protein (336 aa)
PST130_10029_1							13351	5e-136	predicted protein (475 aa)
PST130_1003_1
PST130_10032_2							8485	3e-46	predicted protein (234 aa)
PST130_10033_2
PST130_10034_2	PF02744.11	GalP_UDP_tr_C	5.4e-15	GO:0003674 GO:0016779 GO:0044262	galactose-1-phosphate uridylyltransferase		11040	7e-24	galactose-1-phosphate uridylyltransferase (367 aa)
PST130_10034_3	PF01087.1	GalP_UDP_transf	9.3e-18	GO:0003674 GO:0016779 GO:0044262	galactose-1-phosphate uridylyltransferase		11040	3e-25	galactose-1-phosphate uridylyltransferase (367 aa)
PST130_10034_4	PF01087.1	GalP_UDP_transf	4.7e-26	GO:0008150 GO:0003674 GO:0016779	galactose-1-phosphate uridylyltransferase		11040	2e-43	galactose-1-phosphate uridylyltransferase (367 aa)
PST130_10034_5
PST130_10035_2						GH737750.1	10094	6e-54	predicted protein (180 aa)
PST130_10036_3	PF00096.20	zf-C2H2	0.0071				1345	3e-106	predicted protein (550 aa)
PST130_10037_1							19719	5e-16	predicted protein (198 aa)
PST130_10038_1	PF08613.5	Cyclin	9.7e-11				12972	3e-150	predicted protein (1056 aa)
PST130_10038_3
PST130_10039_1							17740	2e-31	predicted protein (526 aa)
PST130_10039_2	PF03959.7	FSH1	1.7e-38				17691	2e-78	predicted protein (209 aa)
PST130_1004_1						GH737076.1	17994	7e-25	predicted protein (399 aa)
PST130_10040_1
PST130_10040_2							15192	7e-20	predicted protein (334 aa)
PST130_10040_3							15192	9e-13	predicted protein (334 aa)
PST130_10040_4							15191	1e-63	predicted protein (284 aa)
PST130_10041_2
PST130_10042_1
PST130_10042_7							13764	9e-08	predicted protein (592 aa)
PST130_10043_1						GH737076.1	5383	3e-69	predicted protein (502 aa)
PST130_10043_3							20322	6e-95	predicted protein (1263 aa)
PST130_10045_2	PF00350.17	Dynamin_N	3.4e-35				3834	0	dynamin-3 (823 aa)
PST130_10046_3
PST130_10047_5						GH737137.1	14584	1e-08	predicted protein (303 aa)
PST130_10047_6	PF00400.26	WD40	7.9e-05				14583	3e-101	Poly(A)+ RNA export protein (380 aa)
PST130_10048_1							2911	2e-09	predicted protein (710 aa)
PST130_10048_2							7064	4e-13	predicted protein (283 aa)
PST130_10049_1							7148	7e-12	predicted protein (590 aa)
PST130_1005_1
PST130_10050_3							3950	3e-67	conserved hypothetical protein (328 aa)
PST130_10051_1
PST130_10051_2							7879	2e-30	predicted protein (292 aa)
PST130_10052_1	PF04212.12	MIT	2.6e-05				14861	7e-168	hypothetical protein (1492 aa)
PST130_10052_2	PF00013.23	KH_1	2.3e-10				14860	3e-51	hypothetical protein similar to KH domain RNA-binding protein (502 aa)
PST130_10054_1	PF04827.8	Plant_tran	0.00095				10392	4e-25	predicted protein (238 aa)
PST130_10056_1							3687	2e-110	hypothetical protein similar to DNA-dependent DNA polymerase (1795 aa)
PST130_10056_2	PF03104.13	DNA_pol_B_exo1	4.6e-10	GO:0003674 GO:0016740	dna polymerase zeta catalytic		3687	3e-100	hypothetical protein similar to DNA-dependent DNA polymerase (1795 aa)
PST130_10057_1							14513	7e-13	predicted protein (274 aa)
PST130_10057_2
PST130_10059_2
PST130_10061_2							16277	9e-47	hypothetical protein (671 aa)
PST130_10063_1
PST130_10063_4
PST130_10064_2							601	2e-30	hypothetical protein (422 aa)
PST130_10067_1	PF00533.20	BRCT	1.5e-05	GO:0005634	pesc_schpo ame: full=pescadillo homolog ame: full=nucleolar protein 7 homolog		6647	9e-129	pescadillo (634 aa)
PST130_10068_1	PF00930.15	DPPIV_N	0.0015	GO:0005215 GO:0006810 GO:0016787 GO:0016020	vacuolar atp synthase subunit b		3640	8e-73	conserved hypothetical protein (323 aa)
PST130_10069_1
PST130_10069_2							554	1e-35	hypothetical protein similar to Poly(3-hydroxybutyrate) depolymerase (342 aa)
PST130_10070_1							1168	6e-108	conserved hypothetical protein (769 aa)
PST130_10071_10							4550	1e-20	predicted protein (133 aa)
PST130_10071_12				GO:0003674 GO:0008150	short-chain dehydrogenase		4551	8e-64	predicted protein (242 aa)
PST130_10071_14							4550	4e-29	predicted protein (133 aa)
PST130_10071_15							4552	7e-69	predicted protein (213 aa)
PST130_10071_16
PST130_10071_3
PST130_10071_4
PST130_10071_5				GO:0016491 GO:0008150 GO:0003674	short-chain dehydrogenase		4538	2e-15	predicted protein (323 aa)
PST130_10071_8							4550	1e-07	predicted protein (133 aa)
PST130_10071_9
PST130_10072_3	PF03259.11	Robl_LC7	5.7e-11				10344	9e-39	predicted protein (145 aa)
PST130_10072_4	PF00611.17	FCH	6.4e-08				10354	1e-122	hypothetical protein (1369 aa)
PST130_10073_1	PF01761.1	DHQ_synthase	4.3e-103	GO:0003674 GO:0016829 GO:0016740 GO:0008150	pentafunctional arom polypeptide		13928	0	pentafunctional AROM polypeptide (1619 aa)
PST130_10074_1	PF05699.8	Dimer_Tnp_hAT	8.3e-13				1516	1e-147	predicted protein (934 aa)
PST130_10074_3						GH737991.1
PST130_10076_4							3247	5e-154	predicted protein (613 aa)
PST130_10076_9				GO:0003674	nadh:flavin oxidoreductase nadh oxidase		3246	5e-39	hypothetical protein similar to NADH oxidase (393 aa)
PST130_10079_1	PF01602.14	Adaptin_N	1.3e-60	GO:0003674 GO:0016020 GO:0005737 GO:0006810 GO:0008150	er to golgi transport-related		14939	0	coatomer subunit beta (971 aa)
PST130_10079_3	PF01161.14	PBP	0.00012				14938	3e-83	hypothetical protein (342 aa)
PST130_10079_4
PST130_10080_1	PF12796.1	Ank_2	3.8e-06				4697	2e-88	predicted protein (297 aa)
PST130_10080_2	PF05347.9	Complex1_LYR	1.8e-07				4698	1e-67	hypothetical protein (135 aa)
PST130_10080_3	PF01237.12	Oxysterol_BP	3.9e-32	GO:0003674	protein kes1		4699	2e-117	protein KES1 (409 aa)
PST130_10081_3							14066	7e-14	predicted protein (325 aa)
PST130_10082_1							13871	2e-87	predicted protein (548 aa)
PST130_10082_2							19423	5e-151	hypothetical protein similar to reverse transcriptase/ribonuclease H (518 aa)
PST130_10083_1
PST130_10083_3
PST130_10084_2							12161	3e-06	predicted protein (592 aa)
PST130_10085_2
PST130_10085_5
PST130_10086_1
PST130_10089_1
PST130_10089_2	PF01285.12	TEA	8.4e-26				2040	4e-136	predicted protein (465 aa)
PST130_10089_4
PST130_10090_1							16646	4e-11	predicted protein (888 aa)
PST130_10091_1				GO:0003674	domain-containing histone demethylation protein 1		15521	1e-96	JmjC domain-containing histone demethylation protein 1 (744 aa)
PST130_10091_3							15494	8e-27	predicted protein (359 aa)
PST130_10091_5
PST130_10092_2
PST130_10092_3							19623	3e-85	hypothetical protein (453 aa)
PST130_10092_5	PF08240.6	ADH_N	6.2e-13				17917	3e-125	conserved hypothetical protein (383 aa)
PST130_10092_7							19623	3e-153	hypothetical protein (453 aa)
PST130_10093_1							12177	0	hypothetical protein similar to phospholipase D (847 aa)
PST130_10094_1							5928	7e-36	predicted protein (208 aa)
PST130_10094_2
PST130_10095_2							6042	1e-94	predicted protein (297 aa)
PST130_10096_1							16934	2e-16	predicted protein (473 aa)
PST130_10096_2	PF00098.17	zf-CCHC	0.0019				13717	3e-12	predicted protein (179 aa)
PST130_10097_1
PST130_10098_1
PST130_10098_10	PF01144.17	CoA_trans	1.1e-15				2631	0	succinyl-CoA:3-ketoacid-coenzyme A transferase subunit A (542 aa)
PST130_10098_12							1475	6e-13	conserved hypothetical protein (2791 aa)
PST130_10098_3							2106	1e-36	hypothetical protein (160 aa)
PST130_10098_6							2110	1e-30	hypothetical protein (721 aa)
PST130_10098_7							2110	7e-28	hypothetical protein (721 aa)
PST130_10098_8							2102	1e-26	predicted protein (889 aa)
PST130_10099_2
PST130_10100_2	PF00293.1	NUDIX	3.3e-07	GO:0016787 GO:0044255 GO:0016853	isopentenyl-diphosphate delta-isomerase 1	GH737400.1	16470	3e-35	isopentenyl-diphosphate Delta-isomerase 1 (239 aa)
PST130_10100_4	PF00176.17	SNF2_N	4e-06				20507	2e-14	hypothetical protein similar to superfamily II DNA/RNA helicases (306 aa)
PST130_10100_5	PF00271.25	Helicase_C	0.0044	GO:0003674	snf2 family helicase		19349	5e-29	hypothetical protein similar to SNF2/helicase domain-containing protein (713 aa)
PST130_10100_6							20508	7e-15	predicted protein (125 aa)
PST130_10102_3						GH738009.1
PST130_10103_1	PF00122.14	E1-E2_ATPase	2.1e-10	GO:0016787 GO:0005215 GO:0003674 GO:0008150 GO:0016020	p-type atpase		7716	0	hypothetical protein similar to P-type ATPase (1864 aa)
PST130_10104_1							8530	1e-45	hypothetical protein (550 aa)
PST130_10104_2
PST130_10104_3							15952	2e-07	predicted protein (263 aa)
PST130_10105_1	PF00238.13	Ribosomal_L14	1.1e-26	GO:0005575	60s ribosomal protein l23		8677	2e-63	60S ribosomal protein L23 (138 aa)
PST130_10105_3	PF00394.16	Cu-oxidase	5.7e-21				185	8e-174	hypothetical protein similar to LAC2 isoform 2 (537 aa)
PST130_10105_5
PST130_10105_6
PST130_10105_7	PF00106.19	adh_short	4.4e-14	GO:0005575	tsc10_cryne ame: full=3-ketodihydrosphingosine reductase tsc10 ame: full=3-dehydrosphinganine reductase ame: full=kds reductase		181	4e-92	3-ketodihydrosphingosine reductase TSC10 (343 aa)
PST130_10105_8	PF05459.6	Herpes_UL69	0.0085				4440	8e-40	hypothetical protein (456 aa)
PST130_10108_1							1608	4e-62	conserved hypothetical protein (476 aa)
PST130_10108_2							1603	1e-18	hypothetical protein (182 aa)
PST130_10109_2							18523	0	predicted protein (985 aa)
PST130_10111_1	PF09745.3	DUF2040	8.8e-30				925	2e-59	conserved hypothetical protein (468 aa)
PST130_10113_2							10852	2e-122	predicted protein (612 aa)
PST130_10114_4
PST130_10114_7				GO:0003674	hypothetical protein PGTG_19389 [Puccinia graminis f. sp. tritici CRL 75-36-700-3]		19389	5e-105	conserved hypothetical protein (602 aa)
PST130_10115_1	PF09779.3	DUF2349	9.7e-13				13012	7e-130	hypothetical protein (493 aa)
PST130_10115_3	PF10230.3	DUF2305	7.2e-44				13013	7e-144	hypothetical protein (485 aa)
PST130_10115_5							18730	4e-68	predicted protein (425 aa)
PST130_10116_1							12691	2e-30	hypothetical protein (409 aa)
PST130_10117_2
PST130_10117_3	PF03060.9	NMO	0.0021	GO:0016740 GO:0008150	fatty-acid synthase complex		6184	0	fatty acid synthase subunit beta dehydratase (1316 aa)
PST130_10118_2							16192	3e-11	predicted protein (183 aa)
PST130_10119_1				GO:0016491 GO:0008150	acyl-coenzyme a oxidase 1		6197	4e-67	acyl-coenzyme A oxidase (720 aa)
PST130_10120_2	PF01738.1	DLH	1.2e-13				16913	2e-78	conserved hypothetical protein (259 aa)
PST130_10120_4	PF00324.15	AA_permease	9.7e-76				16914	0	amino-acid permease inda1 (561 aa)
PST130_10121_1	PF00180.14	Iso_dh	9.2e-122	GO:0005737 GO:0003674 GO:0008150 GO:0016491 GO:0006519	3-isopropylmalate dehydrogenase		2188	0	3-isopropylmalate dehydrogenase (380 aa)
PST130_10121_2							2189	2e-59	conserved hypothetical protein (437 aa)
PST130_10121_3							2189	8e-47	conserved hypothetical protein (437 aa)
PST130_10122_2
PST130_10124_1							6503	6e-26	predicted protein (593 aa)
PST130_10125_1
PST130_10125_2
PST130_10126_1	PF01399.21	PCI	0.0038	GO:0005815 GO:0012505 GO:0005634 GO:0005737	cop9 signalosome complex subunit 12		12617	9e-90	predicted protein (465 aa)
PST130_10126_2							12617	6e-39	predicted protein (465 aa)
PST130_10126_3	PF07719.11	TPR_2	0.0033	GO:0016020 GO:0005739 GO:0003674	mitochondrial membrane fission protein		12616	5e-76	conserved hypothetical protein (163 aa)
PST130_10126_4
PST130_10126_5							10336	3e-45	predicted protein (758 aa)
PST130_10127_2	PF00012.14	HSP70	1.6e-221	GO:0003674 GO:0006950 GO:0008150	heat shock protein sks2 (heat shock cognate protein hsc1)		5935	0	heat shock protein sks2 (636 aa)
PST130_10129_4							5947	3e-20	hypothetical protein similar to exocyst protein (942 aa)
PST130_10131_2	PF07217.5	Het-C	1.1e-98				13800	4e-126	hypothetical protein similar to heterokaryon incompatibility protein HET-C (492 aa)
PST130_10132_2	PF02338.1	OTU	5.5e-07				34	5e-40	predicted protein (360 aa)
PST130_10132_3
PST130_10134_3	PF01974.1	tRNA_int_endo	1.5e-13				2399	8e-117	hypothetical protein (400 aa)
PST130_10136_1							6537	4e-78	predicted protein (581 aa)
PST130_10136_3							6532	0	predicted protein (938 aa)
PST130_10136_4
PST130_10136_5
PST130_10137_3							10625	2e-14	predicted protein (586 aa)
PST130_10138_2
PST130_1014_1	PF00010.20	HLH	5.2e-13				1893	0	predicted protein (1557 aa)
PST130_1014_5							1010	4e-26	hypothetical protein similar to cytoplasm protein (967 aa)
PST130_10140_1						GH737292.1
PST130_10143_4
PST130_10145_1	PF05699.8	Dimer_Tnp_hAT	6.2e-08				19492	2e-76	predicted protein (847 aa)
PST130_10145_10
PST130_10145_11							14974	4e-25	predicted protein (316 aa)
PST130_10145_2							6128	4e-55	predicted protein (187 aa)
PST130_10145_4	PF10277.3	Frag1	3e-32				6125	5e-93	hypothetical protein (272 aa)
PST130_10145_5
PST130_10145_6
PST130_10145_7							6124	4e-132	predicted protein (728 aa)
PST130_10145_8
PST130_10148_3
PST130_10148_6							8317	7e-13	predicted protein (128 aa)
PST130_10149_1
PST130_10149_4							13693	6e-07	predicted protein (359 aa)
PST130_10150_6	PF01370.15	Epimerase	1.2e-11	GO:0008150 GO:0003674	udp-glucose 4-epimerase		14524	2e-103	GAL10 (452 aa)
PST130_10151_4	PF00010.20	HLH	1.2e-06				2058	2e-49	hypothetical protein (886 aa)
PST130_10152_1							15730	3e-51	predicted protein (878 aa)
PST130_10153_2							5652	5e-76	predicted protein (573 aa)
PST130_10154_1	PF10018.3	Med4	1.3e-10				1782	3e-32	predicted protein (134 aa)
PST130_10155_1	PF00071.16	Ras	9.5e-58	GO:0007165 GO:0005575 GO:0016787 GO:0005886 GO:0003674	small g-protein ras1	GH737353.1	12904	1e-103	protein ras-1 precursor (215 aa)
PST130_10155_10							16094	1e-11	predicted protein (264 aa)
PST130_10155_3
PST130_10155_4
PST130_10155_8
PST130_10155_9	PF00125.18	Histone	1.7e-27	GO:0005694 GO:0003677 GO:0051276 GO:0005634 GO:0006950 GO:0006259	histone h2a		10973	5e-52	histone H2A.1 (180 aa)
PST130_10157_3	PF08528.5	Whi5	2.1e-05
PST130_10157_4	PF01764.1	Lipase_3	3.3e-07				1889	2e-142	predicted protein (440 aa)
PST130_10157_7	PF01055.20	Glyco_hydro_31	8.2e-104				1888	0	lysosomal alpha-glucosidase (899 aa)
PST130_10158_1	PF00400.26	WD40	3.8e-10	GO:0005515 GO:0016192 GO:0006810 GO:0012505 GO:0016020 GO:0005794 GO:0016023 GO:0005198	coatomer alpha		15067	0	coatomer subunit alpha (1214 aa)
PST130_10159_1
PST130_10159_2
PST130_10160_1	PF02450.9	LACT	1.7e-52	GO:0016740	phospholipid:diacylglycerol acyltransferase		14693	9e-152	Phospholipid:diacylglycerol acyltransferase (633 aa)
PST130_10161_1
PST130_10162_1
PST130_10162_2	PF00266.1	Aminotran_5	5.6e-33	GO:0008150 GO:0003674	phosphoserine aminotransferase		4988	0	phosphoserine aminotransferase (465 aa)
PST130_10162_3
PST130_10162_4							4990	1e-98	hypothetical protein (445 aa)
PST130_10163_4
PST130_10165_1
PST130_10165_2	PF00069.19	Pkinase	2.1e-08	GO:0003674	clathrin-coated vesicle		17517	0	conserved hypothetical protein (893 aa)
PST130_10165_4							17519	2e-61	hypothetical protein (263 aa)
PST130_10165_6							17519	6e-54	hypothetical protein (263 aa)
PST130_10165_7							17520	5e-55	predicted protein (285 aa)
PST130_10165_9							17521	5e-155	conserved hypothetical protein (379 aa)
PST130_10166_1							14382	6e-08	predicted protein (196 aa)
PST130_10167_1	PF00628.23	PHD	2.4e-06				7006	2e-94	hypothetical protein (1131 aa)
PST130_10167_4	PF12796.1	Ank_2	3.4e-05				7005	2e-103	conserved hypothetical protein (293 aa)
PST130_10168_1
PST130_10168_11							12737	8e-17	hypothetical protein similar to DUF159 domain-containing protein (363 aa)
PST130_10168_12	PF02586.8	DUF159	2.7e-35				12737	1e-46	hypothetical protein similar to DUF159 domain-containing protein (363 aa)
PST130_10168_13	PF01757.16	Acyl_transf_3	6.5e-05				12730	0	predicted protein (628 aa)
PST130_10168_15
PST130_10168_3							12739	9e-74	predicted protein (188 aa)
PST130_10168_9	PF00071.16	Ras	8.8e-18	GO:0005575 GO:0003674	ras small monomeric gtpase		12740	4e-64	protein ras-1 precursor (206 aa)
PST130_10169_1	PF00762.1	Ferrochelatase	9e-47				8955	0	ferrochelatase, mitochondrial precursor (389 aa)
PST130_10169_2
PST130_1017_1							2157	9e-40	hydroxyacylglutathione hydrolase (333 aa)
PST130_10170_3	PF00106.19	adh_short	3.1e-21	GO:0008150 GO:0016491 GO:0003674	nadp-dependent mannitol dehydrogenase		1366	6e-111	hypothetical protein similar to PIG8 (255 aa)
PST130_10172_2
PST130_10173_1	PF07529.7	HSA	2.8e-11	GO:0008150	chromatin modification-related		12218	0	predicted protein (1210 aa)
PST130_10173_3						GH737387.1	7892	2e-25	conserved hypothetical protein (234 aa)
PST130_10174_5							2204	8e-85	predicted protein (312 aa)
PST130_10174_7	PF08241.6	Methyltransf_11	7.1e-13	GO:0016740 GO:0008150	sterol 24-c-methyltransferase	GH738010.1	2203	0	sterol 24-C-methyltransferase (Delta(24)-sterol C-methyltransferase) (361 aa)
PST130_10175_1	PF02301.12	HORMA	1.3e-18				17593	9e-56	predicted protein (269 aa)
PST130_10176_1
PST130_10178_1
PST130_10178_2	PF07393.5	Sec10	1.5e-38				1415	4e-72	predicted protein (1236 aa)
PST130_10179_1
PST130_10179_2
PST130_10179_6							18770	6e-11	predicted protein (113 aa)
PST130_10179_8	PF12695.1	Abhydrolase_5	5.5e-08				9545	2e-63	predicted protein (339 aa)
PST130_10179_9							3258	3e-33	hypothetical protein (410 aa)
PST130_10180_2							4440	2e-46	hypothetical protein (456 aa)
PST130_10181_1	PF04130.7	Spc97_Spc98	4.8e-85			GH737930.1	12437	0	hypothetical protein similar to gamma tubulin complex subunit Alp4 (1145 aa)
PST130_10181_2	PF04082.12	Fungal_trans	1.6e-07				12440	5e-133	conserved hypothetical protein (919 aa)
PST130_10183_1
PST130_10183_3							3796	1e-55	predicted protein (737 aa)
PST130_10184_3	PF08569.5	Mo25	1.7e-08	GO:0003674	calcium-binding protein 39		11280	3e-90	calcium-binding protein 39 (368 aa)
PST130_10185_3
PST130_10185_5
PST130_10185_6							15986	2e-121	predicted protein (662 aa)
PST130_10185_8	PF00730.1	HhH-GPD	4.7e-19	GO:0008150 GO:0003674	dna-(apurinic or apyrimidinic site)		15983	3e-107	hypothetical protein similar to DNA binding / endonuclease/ iron ion binding (459 aa)
PST130_10186_2	PF03179.9	V-ATPase_G	8.2e-23				2270	1e-23	hypothetical protein (155 aa)
PST130_10187_2
PST130_10190_1							16114	2e-95	predicted protein (1041 aa)
PST130_10192_3
PST130_10193_1
PST130_10193_2	PF01794.13	Ferric_reduct	3.8e-14	GO:0016020 GO:0016491 GO:0003674	nadph oxidase isoform 2		4320	0	NADPH oxidase 3 (653 aa)
PST130_10193_3	PF01602.14	Adaptin_N	5.1e-24				4319	0	AP-2 complex subunit alpha (920 aa)
PST130_10194_2
PST130_10195_10
PST130_10195_11
PST130_10195_12	PF03443.8	Glyco_hydro_61	1.3e-10				17447	2e-140	predicted protein (387 aa)
PST130_10195_3							10519	2e-10	hypothetical protein similar to hAT family dimerisation domain containing protein (727 aa)
PST130_10195_5	PF00106.19	adh_short	6.1e-22	GO:0008150	3-hydroxyacyl- dehydrogenase		17451	3e-89	3-hydroxyacyl-CoA dehydrogenase type-2 (219 aa)
PST130_10195_6	PF01585.17	G-patch	5.2e-05				17449	2e-86	predicted protein (471 aa)
PST130_10195_7							4096	9e-49	predicted protein (484 aa)
PST130_10195_9							17448	3e-11	predicted protein (297 aa)
PST130_10196_2							16665	6e-41	conserved hypothetical protein (267 aa)
PST130_10198_1
PST130_10200_1							16241	0	predicted protein (874 aa)
PST130_10200_2	PF00270.23	DEAD	3.6e-09				18168	0	ATP-dependent DNA helicase recQ (725 aa)
PST130_10201_1							9909	4e-19	predicted protein (302 aa)
PST130_10202_2							9721	9e-07	predicted protein (143 aa)
PST130_10202_5
PST130_10204_2							15461	2e-13	sorting nexin-3 (284 aa)
PST130_10205_1							720	1e-104	predicted protein (639 aa)
PST130_10205_2
PST130_10205_4							11218	8e-16	hypothetical protein (396 aa)
PST130_10206_10	PF04810.9	zf-Sec23_Sec24	2.2e-15			GH737884.1	16632	0	hypothetical protein similar to sec24D protein (868 aa)
PST130_10206_6
PST130_10206_9
PST130_10207_1	PF03171.14	2OG-FeII_Oxy	0.0042				11700	1e-180	conserved hypothetical protein (956 aa)
PST130_10208_2
PST130_10208_3							17204	6e-33	phosphatidic acid phosphatase type 2 domain-containing protein 1B (446 aa)
PST130_10209_2							4076	1e-25	predicted protein (286 aa)
PST130_10210_1	PF05699.8	Dimer_Tnp_hAT	1.2e-10				19492	2e-61	predicted protein (847 aa)
PST130_10212_2
PST130_10214_2
PST130_10214_3	PF00083.18	Sugar_tr	0.00053				9404	8e-114	hypothetical protein similar to glycerophosphodiester transporter (294 aa)
PST130_10214_5	PF10186.3	Atg14	3.2e-08				9405	7e-96	hypothetical protein (539 aa)
PST130_10215_1	PF01300.12	Sua5_yciO_yrdC	7.4e-55				19838	0	hypothetical protein similar to SUA5 protein (445 aa)
PST130_10216_4	PF10173.3	DUF2343	0.00059
PST130_10219_2							16410	8e-29	predicted protein (354 aa)
PST130_10220_1							6210	2e-139	hypothetical protein (385 aa)
PST130_10220_2	PF00085.14	Thioredoxin	1.8e-06				6211	2e-57	predicted protein (198 aa)
PST130_10221_1
PST130_10225_1	PF08506.4	Cse1	3.4e-119	GO:0016020 GO:0012505 GO:0005634 GO:0003674 GO:0005215 GO:0006810 GO:0008150	karyopherin kap109		2531	0	hypothetical protein similar to karyopherin Kap109 (982 aa)
PST130_10226_2	PF00134.17	Cyclin_N	0.0081				3730	2e-16	hypothetical protein similar to cyclin Ctk2 (400 aa)
PST130_10227_1							681	3e-40	predicted protein (595 aa)
PST130_10227_2
PST130_10228_4							11382	1e-31	predicted protein (349 aa)
PST130_10228_6							9982	9e-12	predicted protein (247 aa)
PST130_10229_1							1764	1e-24	hypothetical protein (525 aa)
PST130_10230_2
PST130_10231_2							200	1e-53	predicted protein (472 aa)
PST130_10232_1							19641	9e-63	hypothetical protein (598 aa)
PST130_10232_5							3476	5e-138	predicted protein (1036 aa)
PST130_10234_3	PF03036.10	Perilipin	2.6e-07				2152	1e-142	hypothetical protein (269 aa)
PST130_10235_2							61	4e-18	hypothetical protein (307 aa)
PST130_10236_1
PST130_10236_2							9643	1e-108	conserved hypothetical protein (430 aa)
PST130_10236_3	PF00498.20	FHA	0.00072				7567	8e-41	predicted protein (1181 aa)
PST130_10237_2	PF03184.13	DDE_1	0.00045			GH737387.1	11720	9e-88	predicted protein (407 aa)
PST130_10237_3							13114	8e-96	predicted protein (649 aa)
PST130_10238_1							11160	1e-116	hypothetical protein (384 aa)
PST130_10239_1
PST130_1024_1						GH738022.1	34	1e-25	predicted protein (360 aa)
PST130_10240_2
PST130_10240_4							15003	2e-22	predicted protein (314 aa)
PST130_10241_1							9090	5e-18	hypothetical protein (359 aa)
PST130_10242_1
PST130_10243_3							10159	3e-72	predicted protein (624 aa)
PST130_10243_5
PST130_10243_6							743	2e-11	predicted protein (134 aa)
PST130_10244_1
PST130_10245_1							18442	6e-38	predicted protein (640 aa)
PST130_10245_2	PF01536.1	SAM_decarbox	3.6e-63	GO:0006519 GO:0005575	s-adenosylmethionine decarboxylase proenzyme		18443	4e-153	hypothetical protein similar to S-adenosylmethionine decarboxylase (428 aa)
PST130_10246_2							11320	2e-09	predicted protein (203 aa)
PST130_10247_2	PF05699.8	Dimer_Tnp_hAT	1.4e-10				20144	2e-40	predicted protein (873 aa)
PST130_10248_2
PST130_10249_1							10072	1e-24	predicted protein (541 aa)
PST130_10249_2	PF05531.6	NPV_P10	0.0079				10078	0	protein CASP (731 aa)
PST130_1025_1	PF00400.26	WD40	7.8e-08	GO:0005740 GO:0016020	mitochondrial division protein 1		17698	8e-44	mitochondrial division protein 1 (783 aa)
PST130_10250_1							9125	2e-79	predicted protein (469 aa)
PST130_10252_1							9706	7e-133	conserved hypothetical protein (604 aa)
PST130_10252_3							9705	0	conserved hypothetical protein (2439 aa)
PST130_10253_1							11107	3e-24	hypothetical protein (431 aa)
PST130_10254_1							2531	3e-16	hypothetical protein similar to karyopherin Kap109 (982 aa)
PST130_10254_2							4171	6e-156	predicted protein (944 aa)
PST130_10255_1							19195	7e-11	urease (779 aa)
PST130_10256_1
PST130_10256_2							16674	0	predicted protein (1388 aa)
PST130_10257_1	PF00611.17	FCH	2.1e-18				16936	5e-85	predicted protein (564 aa)
PST130_10257_2							16931	2e-09	predicted protein (203 aa)
PST130_10258_2	PF08059.7	SEP	4.2e-25				14848	2e-172	hypothetical protein similar to YBLO515 (519 aa)
PST130_10258_3	PF05546.5	She9_MDM33	4.8e-62	GO:0005575	mitochondrial inner membrane		14849	1e-124	hypothetical protein similar to mitochondrial inner membrane protein (448 aa)
PST130_10259_1
PST130_1026_1	PF00098.17	zf-CCHC	6.7e-07				3348	2e-16	predicted protein (432 aa)
PST130_10260_1
PST130_10261_1	PF00366.14	Ribosomal_S17	3.6e-05				8835	6e-27	hypothetical protein (165 aa)
PST130_10261_3
PST130_10261_6
PST130_10262_3							665	1e-18	transcriptional adapter 2 (759 aa)
PST130_10267_3							5623	0	predicted protein (934 aa)
PST130_10268_1							4683	2e-34	predicted protein (288 aa)
PST130_10270_1							5623	0	predicted protein (934 aa)
PST130_10272_3							19726	4e-18	predicted protein (284 aa)
PST130_10274_1							2442	6e-11	predicted protein (595 aa)
PST130_10275_1	PF08284.5	RVP_2	1.8e-07				8899	3e-16	predicted protein (305 aa)
PST130_10276_1
PST130_10279_2	PF03357.15	Snf7	1.1e-47	GO:0006810	vacuolar protein sorting-associated protein 60
PST130_10279_3
PST130_10280_2
PST130_10282_1							230	6e-41	predicted protein (887 aa)
PST130_10282_2	PF01632.13	Ribosomal_L35p	3.7e-17	GO:0005575	ribosomal protein l35		231	7e-61	hypothetical protein (189 aa)
PST130_10282_3	PF00493.17	MCM	3.5e-36	GO:0008150 GO:0006259 GO:0004386 GO:0003677 GO:0003674 GO:0005634	dna replication licensing factor mcm5		7804	2e-44	DNA replication licensing factor mcm5 (726 aa)
PST130_10283_1							4972	2e-26	predicted protein (357 aa)
PST130_10284_2
PST130_10285_2							17701	4e-59	hypothetical protein similar to mitochondrion protein (379 aa)
PST130_10286_2							4144	4e-49	hypothetical protein similar to cytoplasm protein (471 aa)
PST130_10288_1	PF00270.23	DEAD	4e-06				16600	2e-87	ATP-dependent DNA helicase recQ (478 aa)
PST130_10289_2
PST130_10289_3							20106	6e-50	hypothetical protein (331 aa)
PST130_1029_1							3514	2e-148	predicted protein (560 aa)
PST130_10290_2
PST130_10291_2
PST130_10293_2	PF03169.9	OPT	0.0051				17794	6e-10	predicted protein (793 aa)
PST130_10294_2							1604	3e-06	predicted protein (177 aa)
PST130_10294_5							7235	6e-08	predicted protein (132 aa)
PST130_10296_1	PF00077.1	RVP	2.3e-05				15852	2e-180	predicted protein (1026 aa)
PST130_10296_2							20531	9e-12	predicted protein (451 aa)
PST130_10296_3
PST130_10297_3
PST130_10298_2							1274	9e-32	hypothetical protein (413 aa)
PST130_10301_2	PF03155.9	Alg6_Alg8	2.7e-13	GO:0016020 GO:0012505 GO:0005783 GO:0016740	dolichyl pyrophosphate man9 c2 alpha- -		13430	3e-28	hypothetical protein similar to Alg6p (892 aa)
PST130_10301_3
PST130_10301_4							13430	3e-28	hypothetical protein similar to Alg6p (892 aa)
PST130_10301_5	PF07904.7	CT20	2.6e-16				13431	2e-57	predicted protein (317 aa)
PST130_10302_2							5126	0	predicted protein (983 aa)
PST130_10303_1	PF00170.15	bZIP_1	0.0021				1780	1e-11	predicted protein (520 aa)
PST130_10305_1							2411	5e-15	hypothetical protein (219 aa)
PST130_10305_2
PST130_10305_3	PF05808.5	Podoplanin	0.0013				2410	5e-29	hypothetical protein (288 aa)
PST130_10305_5							2408	1e-28	hypothetical protein (240 aa)
PST130_10306_2	PF00069.19	Pkinase	7.7e-24	GO:0016740	cmgc srpk protein kinase		15304	0	serine/threonine-protein kinase SKY1 (612 aa)
PST130_10306_4	PF00022.13	Actin	4.8e-20				15303	3e-158	conserved hypothetical protein (717 aa)
PST130_10308_2							17545	4e-22	predicted protein (510 aa)
PST130_10308_4							17547	2e-52	hypothetical protein (173 aa)
PST130_10309_1
PST130_10310_1
PST130_10313_3							10852	3e-139	predicted protein (612 aa)
PST130_10315_2							5038	1e-06	predicted protein (445 aa)
PST130_10316_2	PF00447.11	HSF_DNA-bind	5.2e-32	GO:0003677	trimeric heat shock transcription activates multiple genes in response to stresses that incl		2256	0	predicted protein (924 aa)
PST130_10316_3	PF06747.7	CHCH	0.00011	GO:0005737	metal ion		2257	1e-49	cytochrome c oxidase assembly protein COX19 (95 aa)
PST130_10317_1
PST130_10317_2							9168	4e-37	predicted protein (637 aa)
PST130_10317_3
PST130_10318_2	PF02854.13	MIF4G	4.7e-22				18728	4e-87	conserved hypothetical protein (645 aa)
PST130_10318_3							5759	2e-83	hypothetical protein (230 aa)
PST130_10319_4				GO:0003674 GO:0006519 GO:0008150 GO:0016740	aspartate aminotransferase		13064	8e-30	aspartate aminotransferase, mitochondrial precursor (429 aa)
PST130_10320_1							12455	3e-54	predicted protein (447 aa)
PST130_10322_2
PST130_10322_3							8707	1e-15	predicted protein (497 aa)
PST130_10323_3
PST130_10323_4	PF07724.8	AAA_2	9.8e-37	GO:0003674 GO:0016787 GO:0008150	atp-dependent clp atp-binding subunit		14228	4e-99	ATP-dependent Clp protease ATP-binding subunit clpX (585 aa)
PST130_10323_5
PST130_10326_1
PST130_10326_3	PF01490.12	Aa_trans	6.2e-56				16456	0	conserved hypothetical protein (735 aa)
PST130_10327_1							5099	2e-24	conserved hypothetical protein (486 aa)
PST130_10328_2							8222	4e-40	hypothetical protein (195 aa)
PST130_10328_4							8224	9e-07	predicted protein (238 aa)
PST130_10328_6
PST130_10328_7	PF00098.17	zf-CCHC	2e-05			GH737439.1	9338	1e-89	hypothetical protein (288 aa)
PST130_10329_1	PF05922.10	Inhibitor_I9	1.1e-08	GO:0008233	autophagic serine protease alp2		14692	0	subtilase-type proteinase psp3 precursor (552 aa)
PST130_10330_2
PST130_10331_4						GH738077.1	7326	3e-140	predicted protein (493 aa)
PST130_10331_6							17018	3e-17	predicted protein (216 aa)
PST130_10331_7
PST130_10332_2	PF10374.3	EST1	7e-11				1761	0	conserved hypothetical protein (955 aa)
PST130_10332_3	PF12239.2	DUF3605	4.3e-05				1762	1e-87	predicted protein (495 aa)
PST130_10332_4
PST130_10335_3
PST130_10336_2							12047	7e-28	predicted protein (274 aa)
PST130_10337_1	PF00231.13	ATP-synt	3.6e-64	GO:0006810	atp synthase subunit gamma		10707	4e-168	ATP synthase gamma chain, mitochondrial precursor (308 aa)
PST130_10338_1	PF02230.10	Abhydrolase_2	4.9e-28				19224	2e-90	predicted protein (322 aa)
PST130_10339_1							14311	2e-52	predicted protein (695 aa)
PST130_10340_1	PF00415.12	RCC1	0.00023	GO:0051276 GO:0006810 GO:0030234 GO:0007165 GO:0007049 GO:0005634 GO:0008150	regulator of chromosome condensation		14398	0	regulator of chromosome condensation (678 aa)
PST130_10342_1
PST130_10342_2							17429	4e-110	predicted protein (1029 aa)
PST130_10343_3							4100	3e-74	predicted protein (665 aa)
PST130_10343_4							14765	2e-105	hypothetical protein similar to reverse transcriptase/ribonuclease H (481 aa)
PST130_10345_1							2453	1e-33	predicted protein (1624 aa)
PST130_10345_2
PST130_10346_1							19423	2e-86	hypothetical protein similar to reverse transcriptase/ribonuclease H (518 aa)
PST130_10348_1
PST130_10350_3							3578	4e-08	predicted protein (380 aa)
PST130_10350_6	PF02771.10	Acyl-CoA_dh_N	1.5e-25	GO:0008150 GO:0016491	isovaleryl- dehydrogenase		17165	0	acyl-CoA dehydrogenase (445 aa)
PST130_10351_3	PF07716.9	bZIP_2	8e-06				17608	1e-27	hypothetical protein (181 aa)
PST130_10353_1	PF02668.10	TauD	1.7e-06	GO:0003674 GO:0016491 GO:0008150 GO:0006766 GO:0006519	trimethyllysine dioxygenase		19005	3e-15	trimethyllysine dioxygenase, mitochondrial precursor (511 aa)
PST130_10353_2
PST130_10353_3							19008	5e-92	predicted protein (415 aa)
PST130_10355_2
PST130_10356_1							4972	5e-21	predicted protein (357 aa)
PST130_10359_1							17027	2e-155	predicted protein (696 aa)
PST130_10359_2
PST130_1036_1	PF04827.8	Plant_tran	0.0011				3495	4e-07	conserved hypothetical protein (434 aa)
PST130_10360_3							3032	5e-26	hypothetical protein (189 aa)
PST130_10361_1	PF00493.17	MCM	1e-136	GO:0006259 GO:0016787 GO:0003674	atp dependent dna		8637	0	DNA replication licensing factor MCM7 (811 aa)
PST130_10361_3						GH737013.1	8638	2e-51	predicted protein (293 aa)
PST130_10361_5
PST130_10362_1						GH738158.1	3361	4e-24	predicted protein (640 aa)
PST130_10363_2
PST130_10363_4
PST130_10364_1	PF10584.3	Proteasome_A_N	4.6e-13	GO:0008233 GO:0005575	proteasome subunit alpha type-3		6936	2e-102	proteasome subunit alpha type-3 (252 aa)
PST130_10364_3
PST130_10365_2							15855	7e-14	predicted protein (405 aa)
PST130_10366_3	PF04827.8	Plant_tran	0.0093				7801	3e-08	conserved hypothetical protein (414 aa)
PST130_10367_1
PST130_10367_3
PST130_10368_1
PST130_10368_11							7119	3e-32	predicted protein (457 aa)
PST130_10368_3
PST130_10368_6	PF00790.13	VHS	3.7e-20				7811	4e-67	predicted protein (520 aa)
PST130_10368_8
PST130_10369_2							746	5e-17	hypothetical protein (617 aa)
PST130_10369_3							17586	1e-33	predicted protein (449 aa)
PST130_10370_1
PST130_10371_2							19194	5e-10	hypothetical protein (815 aa)
PST130_10371_3							19194	0	hypothetical protein (815 aa)
PST130_10372_2
PST130_10372_3							7183	3e-10	predicted protein (1537 aa)
PST130_10372_6							6582	1e-54	predicted protein (310 aa)
PST130_10372_7	PF01056.12	Myc_N	0.00063				19386	4e-33	predicted protein (942 aa)
PST130_10373_2	PF00069.19	Pkinase	4.7e-13				15320	1e-96	cell division protein kinase 7 (379 aa)
PST130_10375_1						GH737246.1
PST130_10375_3
PST130_10376_1	PF00270.23	DEAD	0.00087	GO:0004386 GO:0003674	pre-mrna splicing factor atp-dependent rna helicase prp16		13494	2e-50	pre-mRNA splicing factor ATP-dependent RNA helicase PRP16 (736 aa)
PST130_10376_2							13465	4e-12	hypothetical protein (243 aa)
PST130_10378_2
PST130_10378_4							17018	7e-07	predicted protein (216 aa)
PST130_10378_5
PST130_10379_1
PST130_10379_2							2212	1e-106	predicted protein (389 aa)
PST130_10381_5
PST130_10382_2							20484	3e-11	hypothetical protein similar to terpenoid cylases/protein prenyltransferase alpha-alpha toroid (622 aa)
PST130_10383_1	PF05680.6	ATP-synt_E	0.0039				775	9e-49	predicted protein (1057 aa)
PST130_10384_3
PST130_10385_2							10100	1e-36	hypothetical protein (611 aa)
PST130_10387_1							7273	5e-06	predicted protein (838 aa)
PST130_10389_2
PST130_10390_4	PF03982.7	DAGAT	3e-28	GO:0016740	diacylglycerol o-		14227	3e-41	diacylglycerol O-acyltransferase 2A (394 aa)
PST130_10391_2							10077	3e-07	hypothetical protein (627 aa)
PST130_10392_1	PF04408.17	HA2	4.6e-19	GO:0005730 GO:0003674 GO:0004386	atp-dependent rna helicase		13494	3e-167	pre-mRNA splicing factor ATP-dependent RNA helicase PRP16 (736 aa)
PST130_10393_3							9091	7e-11	predicted protein (435 aa)
PST130_10393_4
PST130_10394_2	PF11921.2	DUF3439	0.0016				1121	8e-64	UDP-glucuronic acid decarboxylase 1 (437 aa)
PST130_10395_2							566	1e-22	hypothetical protein similar to DUF726 family protein (997 aa)
PST130_10396_1							16507	5e-17	predicted protein (422 aa)
PST130_10396_2
PST130_10397_3
PST130_10398_2	PF09766.3	FimP	8.9e-11				44	4e-30	predicted protein (230 aa)
PST130_10399_1	PF08614.5	ATG16	2.1e-42				8514	5e-65	hypothetical protein (219 aa)
PST130_1040_1
PST130_10401_1							1708	7e-124	predicted protein (816 aa)
PST130_10401_2							19867	1e-40	ATP-dependent DNA helicase recQ (703 aa)
PST130_10403_1							18765	7e-55	hypothetical protein similar to DNA binding (397 aa)
PST130_10404_1	PF04193.8	PQ-loop	1.3e-17				13361	2e-48	conserved hypothetical protein (277 aa)
PST130_10404_2	PF01652.12	IF4E	8.4e-15				13360	2e-103	hypothetical protein (480 aa)
PST130_10404_4	PF03665.7	UPF0172	1.4e-29				12275	2e-74	hypothetical protein (235 aa)
PST130_10405_1	PF12937.1	F-box-like	1.1e-11				927	8e-83	hypothetical protein (603 aa)
PST130_10405_3
PST130_10405_5	PF00350.17	Dynamin_N	6.6e-55	GO:0003674	vacuolar dynamin-like gtpase		15816	0	interferon-induced GTP-binding protein Mx (703 aa)
PST130_10405_6
PST130_10405_8							15818	2e-50	hypothetical protein similar to clathrin-coated vesicle protein (2118 aa)
PST130_10406_1							17457	2e-77	predicted protein (584 aa)
PST130_10406_2							19123	5e-45	predicted protein (1089 aa)
PST130_10408_2							4426	2e-15	predicted protein (572 aa)
PST130_10409_1							7069	2e-08	predicted protein (349 aa)
PST130_10409_2							12609	2e-09	predicted protein (288 aa)
PST130_1041_1
PST130_10411_1							9391	2e-37	predicted protein (584 aa)
PST130_10412_1	PF10296.3	DUF2404	0.00097	GO:0016020 GO:0005739	mitochondrion organization and biogenesis-related		509	0	conserved hypothetical protein (573 aa)
PST130_10414_2	PF02548.9	Pantoate_transf	2.8e-70				9130	2e-130	3-methyl-2-oxobutanoate hydroxymethyltransferase (293 aa)
PST130_10415_2							14610	2e-12	predicted protein (197 aa)
PST130_10418_4
PST130_10418_5
PST130_10419_2							18523	0	predicted protein (985 aa)
PST130_10420_3	PF03221.10	HTH_Tnp_Tc5	5.6e-06				374	1e-37	conserved hypothetical protein (355 aa)
PST130_10422_2	PF07393.5	Sec10	6.6e-117				4888	0	hypothetical protein similar to exocyst complex component protein (851 aa)
PST130_10422_4
PST130_10423_1
PST130_10424_2	PF00069.19	Pkinase	3.5e-30	GO:0016070 GO:0004672 GO:0008150 GO:0003674 GO:0005575	cmgc srpk protein kinase		9121	5e-91	hypothetical protein similar to B Chain B (408 aa)
PST130_10424_4	PF02874.17	ATP-synt_ab_N	6.4e-08	GO:0005215 GO:0046483 GO:0016787 GO:0006810 GO:0016020	vacuolar atp synthase subunit b		4166	2e-68	vacuolar ATP synthase subunit B (517 aa)
PST130_10426_1							5868	7e-37	predicted protein (463 aa)
PST130_10429_2							15751	1e-108	predicted protein (576 aa)
PST130_10429_3							3733	0	hypothetical protein similar to UDP-N-acetylglucosaminyltransferase (1595 aa)
PST130_10429_4	PF00515.22	TPR_1	2.6e-05				3733	0	hypothetical protein similar to UDP-N-acetylglucosaminyltransferase (1595 aa)
PST130_10429_5
PST130_10431_1							17464	8e-10	translation initiation factor eIF-2B subunit delta (481 aa)
PST130_10433_3
PST130_10434_1							10422	3e-07	predicted protein (135 aa)
PST130_10436_3							8634	2e-10	predicted protein (455 aa)
PST130_10438_1	PF03006.14	HlyIII	2.8e-12	GO:0016020 GO:0012505 GO:0005783 GO:0005794	endoplasmic reticulum		581	2e-42	predicted protein (399 aa)
PST130_10439_1
PST130_10440_1						GH737124.1	8455	1e-72	hypothetical protein (360 aa)
PST130_10440_3
PST130_10441_1	PF00044.18	Gp_dh_N	0.0019	GO:0005737 GO:0003674 GO:0008150 GO:0006091 GO:0044262 GO:0016491	glyceraldehyde-3-phosphate dehydrogenase precursor		4956	4e-107	glyceraldehyde-3-phosphate dehydrogenase (335 aa)
PST130_10442_2
PST130_10444_1
PST130_10445_2
PST130_10445_3							7946	2e-102	hypothetical protein (316 aa)
PST130_10447_1
PST130_10449_1
PST130_10449_3						GH737355.1	10535	2e-23	predicted protein (799 aa)
PST130_10450_2
PST130_10451_1	PF02770.13	Acyl-CoA_dh_M	1.2e-13	GO:0005777 GO:0008150 GO:0044255 GO:0016491 GO:0003674	acyl-coa oxidase		6197	2e-86	acyl-coenzyme A oxidase (720 aa)
PST130_10451_2	PF01756.13	ACOX	5.9e-39	GO:0016491 GO:0044255	acyl-coa oxidase		6197	2e-162	acyl-coenzyme A oxidase (720 aa)
PST130_10451_3
PST130_10452_1	PF00270.23	DEAD	2.3e-10				11175	0	predicted protein (688 aa)
PST130_10453_2							18765	2e-38	hypothetical protein similar to DNA binding (397 aa)
PST130_10453_3							9194	2e-08	conserved hypothetical protein (169 aa)
PST130_10454_2	PF12695.1	Abhydrolase_5	3.2e-05				15026	1e-137	predicted protein (309 aa)
PST130_10454_3							15629	6e-13	predicted protein (345 aa)
PST130_10457_3							2309	9e-27	predicted protein (507 aa)
PST130_10459_1							5064	6e-31	hypothetical protein (433 aa)
PST130_10460_2
PST130_10461_1							9943	8e-118	predicted protein (846 aa)
PST130_10463_1	PF05091.6	eIF-3_zeta	8e-100	GO:0003674 GO:0005737 GO:0006412 GO:0070271 GO:0030435 GO:0005515 GO:0042221 GO:0005634	translation initiation factor eif3d moe1		10613	6e-119	eukaryotic translation initiation factor 3 subunit D (610 aa)
PST130_10463_2							10612	5e-19	conserved hypothetical protein (856 aa)
PST130_10463_3	PF04437.7	RINT1_TIP1	2.4e-40				10612	4e-127	conserved hypothetical protein (856 aa)
PST130_10463_4							1668	4e-109	conserved hypothetical protein (970 aa)
PST130_10464_1
PST130_10464_2
PST130_10464_5							19423	6e-122	hypothetical protein similar to reverse transcriptase/ribonuclease H (518 aa)
PST130_10465_1	PF00004.23	AAA	2.3e-24	GO:0016787	regulation of meiosis-related		3043	2e-10	ATPase family AAA domain-containing protein 1-A (369 aa)
PST130_10466_1							19697	9e-19	predicted protein (411 aa)
PST130_10467_2	PF00400.26	WD40	0.00015	GO:0005575	kda trp-asp repeats containing protein		17149	2e-170	conserved hypothetical protein (559 aa)
PST130_10469_1						GH737236.1	15859	2e-28	conserved hypothetical protein (739 aa)
PST130_1047_1							14551	3e-08	predicted protein (1640 aa)
PST130_10470_1							1680	9e-81	hypothetical protein similar to Cap3p (686 aa)
PST130_10470_2	PF01719.11	Rep_2	0.0079				1680	1e-92	hypothetical protein similar to Cap3p (686 aa)
PST130_10471_1
PST130_10471_2							10956	6e-15	predicted protein (779 aa)
PST130_10471_3							10956	1e-59	predicted protein (779 aa)
PST130_10472_1							8258	2e-63	predicted protein (250 aa)
PST130_10472_2							10417	2e-48	predicted protein (569 aa)
PST130_10473_1							5126	0	predicted protein (983 aa)
PST130_10475_1							4619	1e-15	predicted protein (1406 aa)
PST130_10475_3	PF00018.22	SH3_1	6.8e-06				4057	7e-22	conserved hypothetical protein (956 aa)
PST130_10476_2							1149	5e-93	predicted protein (357 aa)
PST130_10476_3							6874	2e-55	predicted protein (198 aa)
PST130_10479_1							9338	3e-76	hypothetical protein (288 aa)
PST130_10480_1
PST130_10481_2							1317	1e-85	predicted protein (294 aa)
PST130_10481_4							17058	1e-26	predicted protein (101 aa)
PST130_10481_5						GH737798.1
PST130_10483_1							5317	2e-28	predicted protein (752 aa)
PST130_10483_3
PST130_10483_4							10351	7e-23	predicted protein (439 aa)
PST130_10484_1
PST130_10484_2							1555	2e-26	hypothetical protein (394 aa)
PST130_10486_1							605	4e-46	predicted protein (424 aa)
PST130_10486_3							605	3e-39	predicted protein (424 aa)
PST130_10487_2
PST130_10487_3							18820	2e-72	predicted protein (459 aa)
PST130_10489_2	PF00957.15	Synaptobrevin	1.3e-14	GO:0006810 GO:0016020	snare ykt6		4325	2e-111	hypothetical protein similar to SNARE Ykt6 (208 aa)
PST130_10491_1
PST130_10491_3							9743	3e-10	predicted protein (1332 aa)
PST130_10491_4	PF02992.8	Transposase_21	3.6e-19				2456	1e-98	predicted protein (1003 aa)
PST130_10492_2
PST130_10492_3							9260	5e-15	hypothetical protein (581 aa)
PST130_10492_6							240	1e-19	predicted protein (104 aa)
PST130_10492_9
PST130_10493_1							16172	3e-87	hypothetical protein (472 aa)
PST130_10493_2
PST130_10494_2							9767	0	predicted protein (555 aa)
PST130_10494_5							712	3e-22	predicted protein (858 aa)
PST130_10496_2
PST130_10497_3							2404	2e-13	predicted protein (679 aa)
PST130_10501_2
PST130_10501_3
PST130_10502_3							105	4e-35	predicted protein (782 aa)
PST130_10503_2
PST130_10503_3	PF00450.16	Peptidase_S10	9.8e-21				20238	0	interferon-induced GTP-binding protein Mx2 (707 aa)
PST130_10504_2
PST130_10506_1
PST130_10507_1	PF00400.26	WD40	0.00084
PST130_10508_1	PF01025.13	GrpE	0.0063	GO:0005575 GO:0016070	pre-mrna-splicing factor clf1		12637	0	pre-mRNA-splicing factor CLF1 (755 aa)
PST130_10511_2							4596	8e-07	predicted protein (914 aa)
PST130_10512_1	PF08303.5	tRNA_lig_kinase	1.6e-26				12509	0	hypothetical protein similar to RNA ligase (955 aa)
PST130_10512_3
PST130_10513_1							9300	3e-06	predicted protein (206 aa)
PST130_10515_2
PST130_10515_3
PST130_10515_4							12273	2e-17	predicted protein (401 aa)
PST130_10515_5							12273	1e-42	predicted protein (401 aa)
PST130_10515_9							13791	2e-82	hypothetical protein (275 aa)
PST130_10516_2
PST130_10516_4							20475	3e-12	enzymatic polyprotein (661 aa)
PST130_10517_1							18077	4e-159	hypothetical protein (492 aa)
PST130_10517_3							18075	7e-64	conserved hypothetical protein (266 aa)
PST130_10518_1	PF08407.5	Chitin_synth_1N	3.3e-34	GO:0008150 GO:0016740	chitin synthase		10666	2e-150	chitin synthase 1 (911 aa)
PST130_10519_1
PST130_10519_2							9942	4e-48	conserved hypothetical protein (293 aa)
PST130_10519_3							14299	1e-99	predicted protein (1167 aa)
PST130_1052_2
PST130_10520_3							13024	5e-16	hypothetical protein (263 aa)
PST130_10521_2							15409	3e-52	predicted protein (1007 aa)
PST130_10522_1							5640	1e-35	predicted protein (316 aa)
PST130_10523_2	PF01595.14	DUF21	2.3e-15				1676	9e-72	hypothetical protein similar to hemolysin (726 aa)
PST130_10524_2	PF00999.15	Na_H_Exchanger	1.3e-61				14697	2e-49	predicted protein (141 aa)
PST130_10524_4	PF07217.5	Het-C	2.1e-71			GH737810.1	14696	8e-158	hypothetical protein similar to heterokaryon incompatibility protein HET-C (751 aa)
PST130_10526_1
PST130_10526_2	PF04006.6	Mpp10	0.0013				19039	2e-26	hypothetical protein (379 aa)
PST130_10526_3							19040	3e-07	ATP-dependent RNA helicase DBP5 (537 aa)
PST130_10527_1	PF08939.4	DUF1917	0.0054				5735	5e-49	hypothetical protein similar to cut9+ (805 aa)
PST130_10527_3
PST130_10528_3	PF02601.9	Exonuc_VII_L	0.0056				16392	7e-46	predicted protein (220 aa)
PST130_10528_4	PF00227.1	Proteasome	5e-31	GO:0005737 GO:0005575 GO:0005634 GO:0008233 GO:0044257	proteasome subunit beta type-3		16393	2e-93	proteasome subunit beta type-3 (205 aa)
PST130_10529_3							1059	2e-56	predicted protein (254 aa)
PST130_10530_1
PST130_10530_2	PF02990.10	EMP70	1.3e-39				9235	4e-73	hypothetical protein similar to Tm9sf4 protein (173 aa)
PST130_10530_4							9237	3e-12	predicted protein (605 aa)
PST130_10530_5							9237	2e-97	predicted protein (605 aa)
PST130_10531_4
PST130_10533_2	PF01284.17	MARVEL	0.00063				7024	1e-52	hypothetical protein (158 aa)
PST130_10533_3
PST130_10533_5
PST130_10534_1
PST130_10536_1				GO:0006810	sugar transporter		5495	5e-54	conserved hypothetical protein (638 aa)
PST130_10536_2
PST130_10537_2							12532	5e-11	predicted protein (323 aa)
PST130_10538_2
PST130_10539_1
PST130_10541_2							11928	9e-47	predicted protein (871 aa)
PST130_10542_2
PST130_10543_1
PST130_10544_1	PF01591.12	6PF2K	1.3e-50	GO:0044262 GO:0003674	cytoplasm protein		4144	8e-115	hypothetical protein similar to cytoplasm protein (471 aa)
PST130_10549_1							6953	3e-14	predicted protein (253 aa)
PST130_10550_1							1149	2e-14	predicted protein (357 aa)
PST130_10551_1
PST130_10551_2	PF00307.25	CH	3.5e-07				11709	0	hypothetical protein similar to cytoskeletal protein binding protein (1820 aa)
PST130_10551_3	PF02953.9	zf-Tim10_DDP	8.9e-22	GO:0003674 GO:0006810 GO:0016044 GO:0007005 GO:0005740 GO:0016020	mitochondrial intermembrane space translocase subunit	GH737312.1
PST130_10551_6
PST130_10554_1	PF00270.23	DEAD	0.0031				5231	3e-169	predicted protein (931 aa)
PST130_10557_2							20361	2e-07	predicted protein (472 aa)
PST130_10559_1
PST130_1056_1							19522	3e-52	predicted protein (234 aa)
PST130_10560_3	PF04133.8	Vps55	6.7e-28				12483	1e-49	hypothetical protein (132 aa)
PST130_10560_5	PF00173.22	Cyt-b5	7.9e-15	GO:0016491 GO:0003674 GO:0008150 GO:0005783 GO:0016020	cytochrome b5		2316	2e-09	hypothetical protein similar to inositolphosphorylceramide-B C-26 hydroxylase (359 aa)
PST130_10561_1
PST130_10561_2	PF12171.2	zf-C2H2_jaz	0.00034
PST130_10561_3	PF00076.16	RRM_1	3e-05	GO:0003723	rna-binding protein cwf29
PST130_10561_4	PF02142.16	MGS	1.3e-19	GO:0046483 GO:0003674	purine nucleotide biosynthesis-related		13546	0	bifunctional purine biosynthesis protein PURH (629 aa)
PST130_10561_5	PF04063.8	DUF383	3.8e-55				13545	2e-159	hypothetical protein similar to conserved eukaryotic protein (357 aa)
PST130_10562_1	PF05160.7	DSS1_SEM1	5.7e-07				8936	3e-52	hypothetical protein (129 aa)
PST130_10563_3
PST130_10563_4
PST130_10564_1	PF12701.1	LSM14	6.7e-34	GO:0016020 GO:0006810	lsm14a protein		10898	6e-40	predicted protein (630 aa)
PST130_10567_2							6315	4e-10	predicted protein (1845 aa)
PST130_10567_3							11128	3e-12	predicted protein (874 aa)
PST130_10570_3							10701	2e-22	hypothetical protein (332 aa)
PST130_10570_4
PST130_10572_1
PST130_10572_5	PF00735.12	Septin	2e-100	GO:0005856 GO:0005938 GO:0007049 GO:0005515 GO:0003674	neuronal-specific septin-3		13108	6e-167	hypothetical protein similar to septin 10 (371 aa)
PST130_10573_2							11302	1e-11	predicted protein (369 aa)
PST130_10574_1	PF00271.25	Helicase_C	1.7e-08				530	1e-94	hypothetical protein similar to helicase (648 aa)
PST130_10576_1							14923	8e-20	conserved hypothetical protein (306 aa)
PST130_10576_2							16474	3e-30	conserved hypothetical protein (426 aa)
PST130_10578_2
PST130_10579_1
PST130_10579_2
PST130_1058_1							19517	1e-44	predicted protein (741 aa)
PST130_1058_2
PST130_10581_1							9944	3e-85	predicted protein (947 aa)
PST130_10582_2							7147	9e-09	hypothetical protein (482 aa)
PST130_10583_1
PST130_10583_2
PST130_10585_3							2418	1e-27	predicted protein (984 aa)
PST130_10585_4
PST130_10586_2
PST130_10586_3							18831	3e-49	predicted protein (445 aa)
PST130_10586_6							14475	1e-26	predicted protein (387 aa)
PST130_10586_7							14475	6e-73	predicted protein (387 aa)
PST130_10587_1
PST130_10587_3							15669	1e-76	predicted protein (476 aa)
PST130_10589_3
PST130_10591_1
PST130_10592_2	PF03184.13	DDE_1	2e-05			GH737387.1	11720	9e-105	predicted protein (407 aa)
PST130_10593_2
PST130_10594_3							6579	1e-51	predicted protein (204 aa)
PST130_10594_5							17661	4e-123	predicted protein (282 aa)
PST130_10594_6	PF12763.1	efhand_3	3.9e-05				6574	0	epidermal growth factor receptor substrate 15 (1173 aa)
PST130_10594_7	PF00097.19	zf-C3HC4	4.6e-06				4485	3e-29	hypothetical protein (528 aa)
PST130_10597_1							20194	1e-103	predicted protein (590 aa)
PST130_10597_2							20196	1e-14	predicted protein (696 aa)
PST130_10597_4
PST130_10597_6
PST130_10597_7
PST130_10598_1							3122	7e-76	hypothetical protein (695 aa)
PST130_106_1
PST130_106_2
PST130_10600_1							12633	3e-07	hypothetical protein similar to ATP-dependent DNA ligase (334 aa)
PST130_10601_3
PST130_10602_1
PST130_10602_2							19986	3e-94	hypothetical protein (1101 aa)
PST130_10603_1
PST130_10603_2	PF08550.4	DUF1752	3.1e-05	GO:0003674 GO:0003677	hypothetical transcription factor		14141	4e-63	predicted protein (433 aa)
PST130_10604_1	PF00122.14	E1-E2_ATPase	4.2e-05				3133	1e-19	hypothetical protein similar to P-type cation-transporting ATPase (1150 aa)
PST130_10605_2
PST130_10606_2	PF02636.11	DUF185	3.4e-08				19045	3e-63	hypothetical protein similar to chromosome 2 open reading frame 56 (439 aa)
PST130_10606_3	PF02636.11	DUF185	8.1e-23				19045	6e-88	hypothetical protein similar to chromosome 2 open reading frame 56 (439 aa)
PST130_10608_1
PST130_10608_2	PF05622.6	HOOK	0.0024				17009	1e-149	hypothetical protein (354 aa)
PST130_10609_1							6931	1e-12	hypothetical protein similar to helicase (77 aa)
PST130_10609_3	PF08512.6	Rtt106	0.0062				6461	1e-33	conserved hypothetical protein (410 aa)
PST130_10613_3	PF01532.1	Glyco_hydro_47	3.9e-59				9376	0	predicted protein (441 aa)
PST130_10613_5	PF00026.17	Asp	6.7e-57				9377	0	pepsin A precursor (392 aa)
PST130_10614_1
PST130_10614_10
PST130_10614_2							18302	1e-41	predicted protein (239 aa)
PST130_10614_3	PF11817.2	Foie-gras_1	0.0094				20163	3e-34	predicted protein (283 aa)
PST130_10614_7
PST130_10614_8	PF06728.7	PIG-U	0.0069				7475	2e-14	predicted protein (106 aa)
PST130_10614_9
PST130_10615_1							108	2e-19	hypothetical protein (337 aa)
PST130_10615_3							18728	2e-07	conserved hypothetical protein (645 aa)
PST130_10616_2							12868	3e-12	conserved hypothetical protein (1443 aa)
PST130_10617_1							5234	8e-25	predicted protein (857 aa)
PST130_10618_2							3455	3e-26	predicted protein (349 aa)
PST130_10618_3							3455	3e-20	predicted protein (349 aa)
PST130_10618_4
PST130_10620_1
PST130_10621_1							3513	1e-25	predicted protein (886 aa)
PST130_10622_1	PF11764.2	N-SET	3.4e-16	GO:0005634 GO:0006464 GO:0051276 GO:0016070 GO:0006350 GO:0005737 GO:0003674 GO:0005694 GO:0007165 GO:0006950 GO:0007049 GO:0006259 GO:0016740	setd1a protein		1930	0	hypothetical protein similar to Setd1a protein (1015 aa)
PST130_10622_2	PF01776.11	Ribosomal_L22e	9.8e-44	GO:0005840 GO:0005198 GO:0006412	ribosomal protein l22		1920	4e-47	hypothetical protein (119 aa)
PST130_10622_4							1919	3e-14	hypothetical protein (179 aa)
PST130_10622_6
PST130_10622_7
PST130_10622_8	PF00083.18	Sugar_tr	1.1e-43	GO:0016020 GO:0005215 GO:0006810	inorganic phosphate transporter		1917	0	inorganic phosphate transporter 1-7 /Pi cotransporter) (540 aa)
PST130_10623_6
PST130_10625_1	PF01227.16	GTP_cyclohydroI	2.1e-36	GO:0005737 GO:0016787 GO:0008150 GO:0006725 GO:0046483 GO:0051186	gtp cyclohydrolase i		19999	3e-77	GTP cyclohydrolase I (309 aa)
PST130_10625_2
PST130_10625_3	PF12243.2	CTK3	3.5e-25				16421	4e-45	predicted protein (331 aa)
PST130_10626_1	PF03169.9	OPT	1.4e-09				2926	6e-30	hypothetical protein (240 aa)
PST130_10626_2	PF03169.9	OPT	5.7e-18				2926	2e-51	hypothetical protein (240 aa)
PST130_10627_2							4100	2e-55	predicted protein (665 aa)
PST130_10628_1
PST130_10628_2	PF07779.6	Cas1p	7.9e-56				12883	0	hypothetical protein similar to O-acetyltransferase (895 aa)
PST130_10628_4							12876	1e-176	hypothetical protein (480 aa)
PST130_10629_1							10468	1e-18	citrate synthase (503 aa)
PST130_10629_2							10466	4e-15	predicted protein (541 aa)
PST130_10629_3	PF00153.21	Mito_carr	3.6e-07				10467	9e-120	conserved hypothetical protein (492 aa)
PST130_10631_1							14933	2e-13	predicted protein (145 aa)
PST130_10632_1	PF03142.9	Chitin_synth_2	8.5e-08	GO:0008150 GO:0016740	chitin synthase 1		3325	9e-70	chitin synthase 1 (892 aa)
PST130_10633_1	PF00076.16	RRM_1	1.5e-17	GO:0003674	hypothetical protein PGTG_03324 [Puccinia graminis f. sp. tritici CRL 75-36-700-3]		3324	3e-79	hypothetical protein similar to polyadenylation factor subunit (363 aa)
PST130_10635_2	PF10250.3	O-FucT	3.6e-06				14442	0	hypothetical protein similar to CigA protein (498 aa)
PST130_10636_3	PF02475.10	Met_10	1.4e-33	GO:0008150 GO:0016740	met-10+ protein		14821	3e-58	hypothetical protein similar to met-10+ protein (459 aa)
PST130_10636_4							14821	4e-20	hypothetical protein similar to met-10+ protein (459 aa)
PST130_10636_5
PST130_10637_4
PST130_10638_5							12569	7e-20	predicted protein (550 aa)
PST130_10639_1							4426	3e-06	predicted protein (572 aa)
PST130_10640_4	PF10231.3	DUF2315	2.1e-05				1302	9e-44	hypothetical protein (231 aa)
PST130_10640_5	PF00125.18	Histone	2.7e-22	GO:0005694 GO:0003677 GO:0051276 GO:0005634	histone h2b		1301	2e-50	histone H2B (147 aa)
PST130_10641_1							13486	3e-21	predicted protein (745 aa)
PST130_10641_2							8041	2e-06	predicted protein (193 aa)
PST130_10642_1	PF11865.2	DUF3385	7.4e-43	GO:0016740	phosphatidylinositol 3-kinase tor2		3326	0	phosphatidylinositol 3-kinase tor2 (2454 aa)
PST130_10643_5							4420	2e-14	predicted protein (266 aa)
PST130_10643_7
PST130_10644_3	PF00069.19	Pkinase	6e-07			GH737544.1	15884	0	conserved hypothetical protein (895 aa)
PST130_10644_7							2601	6e-128	predicted protein (495 aa)
PST130_10645_1							18739	7e-09	predicted protein (345 aa)
PST130_10648_1							12277	8e-55	hypothetical protein similar to vacuolar protein (1203 aa)
PST130_10648_2	PF11916.2	Vac14_Fig4_bd	2.5e-07				12277	4e-60	hypothetical protein similar to vacuolar protein (1203 aa)
PST130_10649_1							16955	1e-93	hypothetical protein (477 aa)
PST130_10649_4							5295	1e-108	predicted protein (1084 aa)
PST130_10649_6							11320	1e-11	predicted protein (203 aa)
PST130_1065_1
PST130_1065_2
PST130_10650_2
PST130_10650_4							12892	5e-59	hypothetical protein (486 aa)
PST130_10652_1				GO:0004721	serine threonine-protein phosphatase 4 catalytic subunit		17157	5e-66	serine/threonine-protein phosphatase 4 catalytic subunit (301 aa)
PST130_10652_3							17158	7e-45	hypothetical protein (266 aa)
PST130_10653_3							9304	1e-20	predicted protein (289 aa)
PST130_10654_1							4081	2e-08	predicted protein (799 aa)
PST130_10655_2
PST130_10656_1							5573	3e-45	predicted protein (616 aa)
PST130_10657_1							9972	2e-16	predicted protein (510 aa)
PST130_10658_2
PST130_10659_3	PF03659.8	Glyco_hydro_71	2.8e-17				14990	1e-95	hypothetical protein similar to glucan endo-1,3-alpha-glucosidase Agn1 (423 aa)
PST130_10660_1							18523	6e-06	predicted protein (985 aa)
PST130_10661_2
PST130_10662_2	PF00097.19	zf-C3HC4	0.0011
PST130_10663_1	PF00401.14	ATP-synt_DE	0.0066
PST130_10664_1	PF00676.14	E1_dh	5.5e-06				2140	2e-113	2-oxoglutarate dehydrogenase E1 component, mitochondrial precursor (1054 aa)
PST130_10664_2	PF00462.18	Glutaredoxin	5.3e-07	GO:0019725 GO:0003674 GO:0016491	monothiol glutaredoxin-4		2843	3e-38	monothiol glutaredoxin-4 (153 aa)
PST130_10666_1	PF02724.8	CDC45	4.3e-48	GO:0008150	cell division control protein
PST130_10668_1
PST130_10669_1							18464	2e-06	predicted protein (462 aa)
PST130_10670_1
PST130_10671_1	PF00326.1	Peptidase_S9	3.6e-08	GO:0005575	alanyl dipeptidyl peptidase		8444	1e-113	hypothetical protein similar to alanyl dipeptidyl peptidase (638 aa)
PST130_10672_1	PF00226.25	DnaJ	2.2e-11	GO:0003674	chaperone protein dnaj		1224	5e-149	chaperone protein dnaJ (405 aa)
PST130_10673_2							11922	2e-24	hypothetical protein (264 aa)
PST130_10674_3	PF04097.8	Nic96	4.8e-154				9714	0	hypothetical protein similar to nucleoporin-interacting protein NIC96 (1092 aa)
PST130_10675_2							660	2e-10	predicted protein (664 aa)
PST130_10675_3							660	7e-41	predicted protein (664 aa)
PST130_10675_4
PST130_10675_5	PF01424.16	R3H	1e-05				658	0	predicted protein (986 aa)
PST130_10675_6
PST130_10676_1
PST130_10676_2							2985	7e-20	predicted protein (620 aa)
PST130_10680_2							18111	3e-23	predicted protein (147 aa)
PST130_10681_6						GH737950.1	13391	4e-10	predicted protein (215 aa)
PST130_10682_1
PST130_10683_1							6543	2e-35	predicted protein (861 aa)
PST130_10683_2							2664	2e-32	predicted protein (400 aa)
PST130_10683_4
PST130_10684_1
PST130_10686_1							2132	2e-07	predicted protein (278 aa)
PST130_10689_1	PF00432.15	Prenyltrans	2.3e-05				13799	4e-82	predicted protein (537 aa)
PST130_10690_1							20144	4e-06	predicted protein (873 aa)
PST130_10690_2							20088	3e-137	ribosomal RNA assembly protein mis3 (394 aa)
PST130_10692_1						GH738356.1	16143	2e-46	conserved hypothetical protein (342 aa)
PST130_10693_1	PF00899.15	ThiF	1.4e-30	GO:0008150 GO:0005515 GO:0006464 GO:0016044 GO:0003674 GO:0006519 GO:0006950	autophagy-related 7 isoform cra_a		7890	0	hypothetical protein similar to autophagy protein 7 (732 aa)
PST130_10694_1							4810	4e-06	hypothetical protein (352 aa)
PST130_10696_1						GH737563.1	11307	0	predicted protein (487 aa)
PST130_10696_2
PST130_10697_2							10095	7e-07	predicted protein (214 aa)
PST130_10697_3							10137	2e-13	ser/Thr protein phosphatase (304 aa)
PST130_10698_4	PF04078.7	Rcd1	1.1e-09				3830	3e-83	cell differentiation protein rcd1 (448 aa)
PST130_10700_4
PST130_10701_3							13475	5e-09	hypothetical protein (166 aa)
PST130_10702_1							17392	3e-23	predicted protein (223 aa)
PST130_10702_2	PF00213.12	OSCP	8.1e-40	GO:0006810	f0-atpase delta subunit		12123	5e-117	hypothetical protein similar to F0-ATPase delta subunit (215 aa)
PST130_10703_2	PF00150.12	Cellulase	1.4e-10				11725	3e-171	predicted protein (457 aa)
PST130_10704_3							2240	2e-45	conserved hypothetical protein (643 aa)
PST130_10707_1
PST130_10707_2
PST130_10708_1
PST130_10711_1	PF00724.14	Oxidored_FMN	5.8e-38				4087	8e-149	hypothetical protein similar to oxidoreductase (406 aa)
PST130_10711_3	PF07992.8	Pyr_redox_2	0.0037				3244	2e-169	prenylcysteine oxidase precursor (523 aa)
PST130_10712_2							16035	5e-83	predicted protein (400 aa)
PST130_10713_2							8854	5e-10	predicted protein (141 aa)
PST130_10713_4							8821	5e-28	hypothetical protein (177 aa)
PST130_10714_3							14166	2e-99	hypothetical protein (322 aa)
PST130_10714_6
PST130_10718_2
PST130_10719_2	PF03732.11	Retrotrans_gag	8.8e-07				11604	5e-07	conserved hypothetical protein (447 aa)
PST130_10719_4
PST130_10720_1
PST130_10722_1	PF03109.10	ABC1	1.8e-26	GO:0008150 GO:0070271	abc1 kinase		11689	3e-77	hypothetical protein similar to ABC1 kinase family protein (228 aa)
PST130_10722_2							11779	1e-94	predicted protein (1031 aa)
PST130_10722_3
PST130_10722_4							11695	1e-53	predicted protein (479 aa)
PST130_10723_1							1824	4e-28	predicted protein (566 aa)
PST130_10723_4	PF03484.9	B5	8.3e-09	GO:0016874 GO:0006412 GO:0003674	phenylalanyl-trna synthetase subunit beta		1826	1e-97	conserved hypothetical protein (395 aa)
PST130_10723_5	PF03483.11	B3_4	0.008	GO:0003674	phenylalanyl-trna synthetase beta chain		1827	5e-77	phenylalanyl-tRNA synthetase subunit beta (636 aa)
PST130_10724_2
PST130_10724_3
PST130_10725_7
PST130_10726_1						GH738158.1	744	2e-06	E3 ubiquitin-protein ligase NEDD4 (4198 aa)
PST130_10726_2						GH737076.1	19049	4e-06	predicted protein (583 aa)
PST130_10727_1
PST130_10727_3
PST130_10727_5
PST130_10728_1	PF00098.17	zf-CCHC	6.5e-06			GH737439.1	5139	5e-94	predicted protein (290 aa)
PST130_10729_2							19628	2e-38	predicted protein (206 aa)
PST130_10730_1
PST130_10730_2
PST130_10733_1
PST130_10736_1							3474	3e-13	predicted protein (793 aa)
PST130_10736_2							3475	0	predicted protein (1008 aa)
PST130_10738_3							7212	3e-41	predicted protein (214 aa)
PST130_10738_4
PST130_10739_1	PF00293.1	NUDIX	8.6e-08				13533	9e-52	hypothetical protein (284 aa)
PST130_10739_2							13535	2e-59	predicted protein (326 aa)
PST130_10739_3
PST130_10740_1	PF00200.17	Disintegrin	6.7e-17				745	0	coagulation factor X-activating enzyme heavy chain (766 aa)
PST130_10740_4	PF04433.11	SWIRM	4.7e-34	GO:0003674 GO:0003677	rsc complex subunit		747	0	hypothetical protein similar to SWI/SNF complex transcription regulator (695 aa)
PST130_10740_5	PF08238.6	Sel1	4.4e-06				750	0	conserved hypothetical protein (464 aa)
PST130_10740_6
PST130_10741_3							16647	4e-19	predicted protein (557 aa)
PST130_10742_1	PF06733.9	DEAD_2	5e-14	GO:0005737 GO:0004386 GO:0003677 GO:0003674 GO:0006950 GO:0006259 GO:0005634 GO:0006350	transcription factor tfiih complex subunit rad15		9478	0	TFIIH basal transcription factor complex helicase subunit (577 aa)
PST130_10742_2
PST130_10745_1	PF04827.8	Plant_tran	0.00037				12	6e-15	conserved hypothetical protein (393 aa)
PST130_10746_1	PF05686.6	DUF821	1.6e-07				16484	1e-18	hypothetical protein similar to capsular associated protein (512 aa)
PST130_10747_2
PST130_10748_2
PST130_10749_2	PF00076.16	RRM_1	5e-09	GO:0003674	rna-binding protein		2319	2e-22	hypothetical protein similar to RNA-binding protein (287 aa)
PST130_10749_3	PF12851.1	TET_DSBH	0.0066	GO:0003674	rna-binding protein		2319	2e-107	hypothetical protein similar to RNA-binding protein (287 aa)
PST130_10749_4
PST130_10750_1	PF00170.15	bZIP_1	0.0018				1780	9e-66	predicted protein (520 aa)
PST130_10751_1							4094	0	DNA repair protein RAD50 (1292 aa)
PST130_10757_2
PST130_10757_3							5623	3e-20	predicted protein (934 aa)
PST130_10758_3							15433	2e-10	hypothetical protein (302 aa)
PST130_10759_3						GH737214.1
PST130_10760_3							11371	3e-20	predicted protein (369 aa)
PST130_10761_1						GH737734.1
PST130_10761_4							5739	7e-12	predicted protein (415 aa)
PST130_10761_7
PST130_10763_2							1880	3e-12	predicted protein (473 aa)
PST130_10764_1						GH738030.1	17572	6e-68	hypothetical protein similar to Dug3p (354 aa)
PST130_10764_2							17572	2e-09	hypothetical protein similar to Dug3p (354 aa)
PST130_10765_2							9295	4e-62	predicted protein (443 aa)
PST130_10765_4							17026	1e-14	ATP-dependent DNA helicase recQ (687 aa)
PST130_10766_1							9771	4e-76	DNA polymerase epsilon subunit 2 (560 aa)
PST130_10766_2
PST130_10766_4							9771	7e-16	DNA polymerase epsilon subunit 2 (560 aa)
PST130_10767_1	PF09805.3	Nop25	7.7e-16				10107	2e-60	predicted protein (419 aa)
PST130_1077_1							3377	1e-25	predicted protein (1131 aa)
PST130_10770_2							8091	9e-18	predicted protein (684 aa)
PST130_10771_1
PST130_10773_1							15818	0	hypothetical protein similar to clathrin-coated vesicle protein (2118 aa)
PST130_10773_2
PST130_10778_2	PF00690.20	Cation_ATPase_N	6.1e-14	GO:0008150 GO:0016020 GO:0016787 GO:0005215 GO:0046483 GO:0003674 GO:0006810	plasma membrane atpase 1		12495	0	plasma membrane ATPase 1 (962 aa)
PST130_10778_3							909	2e-18	conserved hypothetical protein (717 aa)
PST130_10779_3							7616	3e-44	predicted protein (574 aa)
PST130_10779_4
PST130_10779_5							7615	2e-164	conserved hypothetical protein (979 aa)
PST130_10780_1	PF00620.21	RhoGAP	2.3e-13				14614	2e-44	rho-GTPase-activating protein 5 (477 aa)
PST130_10780_4	PF05648.8	PEX11	0.0052				14615	4e-08	hypothetical protein (258 aa)
PST130_10780_5							14615	6e-18	hypothetical protein (258 aa)
PST130_10782_1				GO:0016787 GO:0006810 GO:0008150 GO:0016020 GO:0003674	abc transporter		7613	2e-51	ATP-binding cassette (787 aa)
PST130_10784_1
PST130_10784_3	PF06156.7	DUF972	0.0039				19860	1e-86	hypothetical protein similar to rad18 (956 aa)
PST130_10785_1						GH737102.1	11199	1e-15	predicted protein (142 aa)
PST130_10785_3							4345	4e-59	conserved hypothetical protein (931 aa)
PST130_10786_1							1312	1e-28	hypothetical protein similar to serine/threonine-protein kinase PRP4m (956 aa)
PST130_10786_5
PST130_10787_1	PF12298.2	Bot1p	2.8e-06				13971	3e-39	predicted protein (1058 aa)
PST130_10787_2							6430	4e-47	conserved hypothetical protein (1057 aa)
PST130_10787_3							4420	5e-07	predicted protein (266 aa)
PST130_10788_1				GO:0003674	atp -binding protein		1279	5e-21	ATP-binding domain 1 family member B (273 aa)
PST130_10789_1	PF00773.13	RNB	8.4e-94			GH738235.1	6040	0	protein SSD1 (1422 aa)
PST130_10789_2	PF07890.6	Rrp15p	4.5e-20				14435	1e-114	predicted protein (316 aa)
PST130_10790_1							14710	3e-71	predicted protein (1150 aa)
PST130_10791_2							9778	2e-52	predicted protein (347 aa)
PST130_10792_1							14234	5e-34	predicted protein (1026 aa)
PST130_10792_3
PST130_10792_4
PST130_10792_5
PST130_10792_6
PST130_10793_1							3328	1e-42	dynactin subunit 4 (644 aa)
PST130_10794_3							633	1e-122	predicted protein (622 aa)
PST130_10794_5							15669	4e-24	predicted protein (476 aa)
PST130_10794_6							15669	9e-86	predicted protein (476 aa)
PST130_10794_7
PST130_10794_8
PST130_10796_5	PF01351.12	RNase_HII	2.2e-44	GO:0016787	likely ribonuclease hii		10935	6e-146	ribonuclease HI large subunit (350 aa)
PST130_10796_7							10936	4e-76	hypothetical protein (274 aa)
PST130_10797_1
PST130_10799_1
PST130_10800_1
PST130_10800_2
PST130_10803_2
PST130_10803_5
PST130_10803_6
PST130_10803_7							5207	3e-06	hypothetical protein (189 aa)
PST130_10803_9	PF00025.15	Arf	1.5e-08				9140	2e-61	ADP-ribosylation factor 1 (171 aa)
PST130_10804_1							5871	0	predicted protein (967 aa)
PST130_10804_2							5871	4e-37	predicted protein (967 aa)
PST130_10806_1
PST130_10806_2	PF01379.14	Porphobil_deam	1.6e-10				8571	8e-63	porphobilinogen deaminase (462 aa)
PST130_10807_1
PST130_10809_6
PST130_10811_1	PF00749.15	tRNA-synt_1c	9e-08	GO:0008150 GO:0016874 GO:0005575	glutamate-trna ligase		17719	6e-16	glutamyl-tRNA synthetase (794 aa)
PST130_10813_1						GH737817.1	7557	2e-55	predicted protein (525 aa)
PST130_10814_2	PF00475.12	IGPD	1.1e-21			GH737881.1	8188	2e-52	imidazoleglycerol-phosphate dehydratase (208 aa)
PST130_10814_4
PST130_10818_1
PST130_10820_1	PF00622.22	SPRY	1.9e-10				4455	0	hypothetical protein similar to Ash2-trithorax family protein (618 aa)
PST130_10822_1	PF03009.11	GDPD	5.4e-15	GO:0044262 GO:0016787 GO:0008150	hypothetical protein PGTG_10678 [Puccinia graminis f. sp. tritici CRL 75-36-700-3]		10678	6e-31	conserved hypothetical protein (322 aa)
PST130_10822_10	PF06687.6	SUR7	0.00074				15901	4e-103	predicted protein (230 aa)
PST130_10822_5	PF04695.7	Pex14_N	0.0058	GO:0016020 GO:0012505 GO:0005794	cytoplasm protein		7959	2e-36	hypothetical protein similar to cytoplasm protein (260 aa)
PST130_10822_7
PST130_10823_2						GH738022.1	34	3e-28	predicted protein (360 aa)
PST130_10824_3							605	2e-67	predicted protein (424 aa)
PST130_10824_4							605	8e-68	predicted protein (424 aa)
PST130_10824_5							605	7e-06	predicted protein (424 aa)
PST130_10825_1	PF02171.11	Piwi	6.4e-36				8429	1e-116	predicted protein (942 aa)
PST130_10826_1							11420	2e-14	hypothetical protein (779 aa)
PST130_10826_3							3475	0	predicted protein (1008 aa)
PST130_10829_1							18250	3e-14	predicted protein (162 aa)
PST130_10830_1	PF11001.2	DUF2841	8.4e-37	GO:0003677	hypothetical protein PGTG_03241 [Puccinia graminis f. sp. tritici CRL 75-36-700-3]		3241	0	conserved hypothetical protein (722 aa)
PST130_10830_2	PF00551.13	Formyl_trans_N	6.7e-39	GO:0016740	phosphoribosylglycinamide formyltransferase	GH737073.1	3242	2e-106	hypothetical protein similar to ADE8 protein (248 aa)
PST130_10830_3	PF02301.12	HORMA	1e-07				3243	1e-28	conserved hypothetical protein (214 aa)
PST130_10830_4	PF00097.19	zf-C3HC4	0.0048
PST130_10833_1
PST130_10834_1							12027	2e-33	predicted protein (313 aa)
PST130_10834_4
PST130_10835_3							240	2e-18	predicted protein (104 aa)
PST130_10835_4							9250	4e-11	neuronal calcium sensor 1 (191 aa)
PST130_10836_3	PF05345.6	He_PIG	0.00013				4453	0	conserved hypothetical protein (1059 aa)
PST130_10838_1
PST130_10838_2
PST130_10838_3
PST130_10840_2							14654	6e-07	predicted protein (358 aa)
PST130_10840_3
PST130_10841_1
PST130_10842_3							13424	2e-15	conserved hypothetical protein (526 aa)
PST130_10844_2
PST130_10845_4							8391	3e-54	predicted protein (439 aa)
PST130_10847_3							10047	3e-32	predicted protein (281 aa)
PST130_10850_1	PF12776.1	Myb_DNA-bind_3	3.9e-18				6461	7e-38	conserved hypothetical protein (410 aa)
PST130_10850_2							20063	9e-14	predicted protein (856 aa)
PST130_10851_1
PST130_10851_2
PST130_10851_3
PST130_10852_2	PF00397.20	WW	0.0069
PST130_10852_3							15055	5e-09	predicted protein (461 aa)
PST130_10853_1							19806	1e-25	conserved hypothetical protein (811 aa)
PST130_10853_4	PF02037.21	SAP	3.8e-12
PST130_10854_1							12242	7e-46	predicted protein (362 aa)
PST130_10856_1							2458	4e-23	predicted protein (477 aa)
PST130_10856_2							20243	7e-14	predicted protein (417 aa)
PST130_10858_1							1261	3e-69	conserved hypothetical protein (740 aa)
PST130_10858_2	PF00036.26	efhand	0.0082				12307	0	conserved hypothetical protein (966 aa)
PST130_10859_1	PF04614.6	Pex19	6.9e-06				668	7e-30	conserved hypothetical protein (322 aa)
PST130_10859_4
PST130_10860_2							838	5e-38	hypothetical protein (1210 aa)
PST130_10860_3
PST130_10861_2							8634	2e-14	predicted protein (455 aa)
PST130_10862_1	PF02284.10	COX5A	7.5e-20	GO:0008150 GO:0005215 GO:0016491	cytochrome c oxidase subunit		19036	5e-35	hypothetical protein (154 aa)
PST130_10863_1
PST130_10863_2
PST130_10864_3							16448	2e-101	predicted protein (658 aa)
PST130_10864_4							10441	3e-59	predicted protein (918 aa)
PST130_10868_2
PST130_10869_1	PF00225.17	Kinesin	5.7e-100				14853	0	conserved hypothetical protein (1165 aa)
PST130_10869_3							9049	9e-07	predicted protein (105 aa)
PST130_10870_1
PST130_10870_2							2254	0	predicted protein (846 aa)
PST130_10870_3							3420	6e-106	ATP-dependent DNA helicase recQ (756 aa)
PST130_10871_1							1946	2e-11	hypothetical protein similar to ovarian tumour (302 aa)
PST130_10871_3							18696	4e-29	hypothetical protein (340 aa)
PST130_10871_6							18696	2e-48	hypothetical protein (340 aa)
PST130_10871_7	PF02737.12	3HCDH_N	1.3e-45				18721	2e-74	3-hydroxybutyryl-CoA dehydrogenase (287 aa)
PST130_10872_3	PF05791.5	Bacillus_HBL	0.0039
PST130_10872_4	PF04667.11	Endosulfine	5.4e-20				12636	9e-56	hypothetical protein (261 aa)
PST130_10873_3
PST130_10873_5	PF12776.1	Myb_DNA-bind_3	1.3e-10				9450	8e-102	predicted protein (468 aa)
PST130_10874_1							3726	4e-144	predicted protein (798 aa)
PST130_10875_3							13342	7e-42	hypothetical protein similar to myb family protein (311 aa)
PST130_10876_1
PST130_10877_1	PF02516.8	STT3	5.7e-79	GO:0016020 GO:0006464 GO:0044262 GO:0016740	oligosaccharyl transferase stt3 subunit		3848	0	hypothetical protein similar to oligosaccharyltransferase subunit Stt3 (821 aa)
PST130_10878_1
PST130_10878_2
PST130_10880_2							17705	1e-40	hypothetical protein (308 aa)
PST130_10881_1	PF07228.6	SpoIIE	1.2e-11				7080	0	hypothetical protein similar to protein phosphatase 2C (540 aa)
PST130_10882_3
PST130_10884_1							13287	2e-31	phosphatidylinositol transfer protein CSR1 (601 aa)
PST130_10885_3
PST130_10886_1							17018	3e-16	predicted protein (216 aa)
PST130_10887_1
PST130_10888_1	PF01778.11	Ribosomal_L28e	2.5e-19				7129	9e-46	hypothetical protein (195 aa)
PST130_10889_1							11621	1e-11	hypothetical protein similar to CDC37 (525 aa)
PST130_10889_2
PST130_10890_1							15458	2e-21	predicted protein (576 aa)
PST130_10891_1	PF00676.14	E1_dh	0.0068	GO:0016491 GO:0008150	oxoglutarate dehydrogenase (succinyl-transferring)		2140	0	2-oxoglutarate dehydrogenase E1 component, mitochondrial precursor (1054 aa)
PST130_10892_1	PF02252.12	PA28_beta	2.5e-23				13053	2e-16	hypothetical protein (257 aa)
PST130_10892_2	PF12352.2	V-SNARE_C	2.6e-14
PST130_10893_2							2094	6e-16	chitinase 1 precursor (524 aa)
PST130_10894_2	PF03770.10	IPK	7.5e-22				14727	4e-68	predicted protein (364 aa)
PST130_10894_4	PF04056.8	Ssl1	1e-50	GO:0005737 GO:0006950 GO:0006259 GO:0016070 GO:0006350 GO:0070271 GO:0030528 GO:0005634	transcription factor tfiih complex subunit ssl1		14725	1e-107	TFIIH basal transcription factor complex p44 subunit (463 aa)
PST130_10894_5	PF07719.11	TPR_2	7.9e-05				14724	0	hypothetical protein similar to general transcription factor IIIC (1126 aa)
PST130_10894_7	PF00171.1	Aldedh	3.2e-101	GO:0005737 GO:0046483 GO:0006519 GO:0016491	delta-1-pyrroline-5-carboxylate dehydrogenase		14723	0	delta-1-pyrroline-5-carboxylate dehydrogenase, mitochondrial precursor (556 aa)
PST130_10894_8
PST130_10895_1							16428	2e-141	hypothetical protein (584 aa)
PST130_10895_2							14683	1e-17	hypothetical protein (147 aa)
PST130_10896_1							19518	0	predicted protein (565 aa)
PST130_10896_2							19520	1e-42	predicted protein (128 aa)
PST130_10897_3
PST130_10902_1
PST130_10902_2						GH737013.1	759	8e-18	predicted protein (238 aa)
PST130_10903_2
PST130_10905_2
PST130_10906_1
PST130_10906_2							19423	9e-166	hypothetical protein similar to reverse transcriptase/ribonuclease H (518 aa)
PST130_10907_1
PST130_10908_2
PST130_10909_1
PST130_10909_4							9126	3e-19	IN2-2 protein (335 aa)
PST130_10909_6
PST130_1091_1	PF04042.10	DNA_pol_E_B	0.0056				8327	7e-08	DNA polymerase Delta (493 aa)
PST130_10911_1
PST130_10911_3							5141	1e-07	predicted protein (158 aa)
PST130_10913_2
PST130_10913_4							9759	9e-14	hypothetical protein similar to copper radical oxidase (618 aa)
PST130_10914_1
PST130_10915_1	PF00225.17	Kinesin	1e-33				6901	0	kinesin heavy chain (864 aa)
PST130_10915_3	PF08651.4	DASH_Duo1	2.7e-16				6895	6e-48	predicted protein (280 aa)
PST130_10917_1	PF12776.1	Myb_DNA-bind_3	2e-07				16144	5e-18	predicted protein (421 aa)
PST130_10918_4							5093	5e-88	predicted protein (857 aa)
PST130_10918_5
PST130_10919_1							10550	1e-12	predicted protein (285 aa)
PST130_10919_2
PST130_10919_3
PST130_10920_1
PST130_10920_3
PST130_10922_1	PF00071.16	Ras	1.6e-20				11664	1e-54	GTP-binding protein ryh1 (557 aa)
PST130_10922_2	PF00069.19	Pkinase	1.8e-62	GO:0016740	ulk ulk protein kinase		11663	0	MAP kinase-activated protein kinase 3 (1115 aa)
PST130_10924_1	PF00004.23	AAA	1.2e-40	GO:0008233 GO:0008150 GO:0003674	intermembrane space aaa protease iap-1		4643	0	cell division protease ftsH (831 aa)
PST130_10924_2	PF00067.16	p450	6.6e-06				9055	2e-29	hypothetical protein similar to cytochrome P450 family protein (357 aa)
PST130_10925_1							12	4e-39	conserved hypothetical protein (393 aa)
PST130_10925_3							2783	1e-96	predicted protein (529 aa)
PST130_10927_1
PST130_10927_2							240	1e-19	predicted protein (104 aa)
PST130_10929_1							16242	4e-52	predicted protein (402 aa)
PST130_10929_2							16241	0	predicted protein (874 aa)
PST130_10930_1							9984	1e-15	hypothetical protein (194 aa)
PST130_10930_2
PST130_10931_1							18224	2e-163	predicted protein (871 aa)
PST130_10933_1
PST130_10935_1							16266	3e-11	geranylgeranyl transferase type-2 subunit alpha (324 aa)
PST130_10936_2							13691	1e-53	hypothetical protein (147 aa)
PST130_10937_2							10899	6e-15	predicted protein (202 aa)
PST130_10938_2
PST130_10938_3
PST130_10939_1
PST130_10941_1
PST130_10941_2							5626	3e-97	predicted protein (1088 aa)
PST130_10942_2
PST130_10943_2				GO:0016779 GO:0006259 GO:0003677 GO:0005575 GO:0005634 GO:0005737	dna polymerase epsilon subunit 2		20380	3e-141	DNA polymerase epsilon subunit 2 (507 aa)
PST130_10943_3	PF04042.10	DNA_pol_E_B	2.2e-26				9771	1e-86	DNA polymerase epsilon subunit 2 (560 aa)
PST130_10943_4
PST130_10945_3	PF10184.3	DUF2358	0.0016
PST130_10946_2							817	4e-91	predicted protein (539 aa)
PST130_10948_1							20309	1e-144	predicted protein (572 aa)
PST130_10948_5	PF01853.12	MOZ_SAS	5.8e-17	GO:0003674 GO:0016740	histone acetyltransferase esa1		7306	8e-59	histone acetyltransferase ESA1 (879 aa)
PST130_10948_7							7309	4e-166	hypothetical protein similar to peroxidase (525 aa)
PST130_10948_8
PST130_10949_1	PF05699.8	Dimer_Tnp_hAT	0.00042				10009	1e-61	predicted protein (676 aa)
PST130_10952_1							14517	5e-29	conserved hypothetical protein (527 aa)
PST130_10953_2							13350	1e-16	predicted protein (690 aa)
PST130_10953_3	PF02816.1	Alpha_kinase	4.8e-16				13350	2e-29	predicted protein (690 aa)
PST130_10955_2
PST130_10956_1							7624	3e-54	hypothetical protein similar to myb family protein (311 aa)
PST130_10957_1							19716	7e-14	predicted protein (228 aa)
PST130_10958_2							11811	7e-82	predicted protein (836 aa)
PST130_10959_2							2407	4e-08	predicted protein (1030 aa)
PST130_10960_2						GH737725.1
PST130_10961_2
PST130_10963_1							18824	6e-13	hypothetical protein (114 aa)
PST130_10963_2	PF00227.1	Proteasome	2.2e-24	GO:0005575 GO:0008233 GO:0044257	proteasome subunit beta type-4		18823	5e-126	proteasome subunit beta type-4 precursor (265 aa)
PST130_10966_2
PST130_10966_4
PST130_10966_7
PST130_10967_2	PF06140.7	Ifi-6-16	6.3e-08				14986	7e-13	predicted protein (251 aa)
PST130_10967_4							14988	2e-09	60S ribosomal protein L17 (274 aa)
PST130_10968_1
PST130_10968_2							5469	2e-59	predicted protein (317 aa)
PST130_10970_2							18523	3e-18	predicted protein (985 aa)
PST130_10971_2
PST130_10971_4
PST130_10973_3	PF01571.15	GCV_T	0.0016				28	4e-15	aminomethyltransferase, mitochondrial precursor (427 aa)
PST130_10974_1							1781	1e-79	hypothetical protein (649 aa)
PST130_10975_1	PF08082.5	PRO8NT	5.7e-70				662	2e-159	hypothetical protein similar to prp8-PA (2389 aa)
PST130_10975_2	PF08083.5	PROCN	4.4e-34	GO:0005634 GO:0016070	pre-mrna splicing factor		662	1e-38	hypothetical protein similar to prp8-PA (2389 aa)
PST130_10977_1
PST130_10978_2							19672	3e-24	predicted protein (318 aa)
PST130_10978_3							18941	2e-07	predicted protein (319 aa)
PST130_10978_8							19664	7e-46	predicted protein (493 aa)
PST130_10978_9							19664	5e-21	predicted protein (493 aa)
PST130_10979_2							271	9e-14	predicted protein (141 aa)
PST130_10980_3							13807	6e-34	predicted protein (227 aa)
PST130_10980_4	PF00830.13	Ribosomal_L28	2.9e-13				13806	3e-14	predicted protein (256 aa)
PST130_10981_2	PF10551.3	MULE	4.6e-12				17403	2e-32	predicted protein (441 aa)
PST130_10981_3
PST130_10982_1							7771	3e-09	6-phosphogluconolactonase (401 aa)
PST130_10982_3	PF07690.10	MFS_1	8.2e-14				7767	1e-79	conserved hypothetical protein (293 aa)
PST130_10983_1							6066	5e-69	predicted protein (863 aa)
PST130_10984_1
PST130_10984_3	PF10282.3	Lactonase	2.3e-10				17148	3e-137	6-phosphogluconolactonase (397 aa)
PST130_10985_1	PF02257.9	RFX_DNA_binding	0.00021				11391	0	predicted protein (1103 aa)
PST130_10985_3
PST130_10986_1
PST130_10986_2	PF01423.16	LSM	5.1e-16				15117	4e-48	predicted protein (261 aa)
PST130_10987_1				GO:0008150	fact complex subunit spt16		6678	6e-73	FACT complex subunit SPT16 (1090 aa)
PST130_10988_1
PST130_10989_2	PF12710.1	HAD	0.0017				934	2e-20	plasma membrane calcium-transporting ATPase 2 (1374 aa)
PST130_1099_1							2491	2e-11	predicted protein (707 aa)
PST130_10990_2							14337	3e-23	predicted protein (123 aa)
PST130_10993_1	PF00348.11	polyprenyl_synt	2.7e-49				19831	2e-177	geranylgeranyl pyrophosphate synthetase (504 aa)
PST130_10993_3	PF05773.16	RWD	9e-06				12318	1e-56	predicted protein (370 aa)
PST130_10993_4
PST130_10994_1	PF12678.1	zf-rbx1	1.4e-06				4489	3e-61	hypothetical protein (336 aa)
PST130_10994_2	PF04849.7	HAP1_N	0.0079				4485	2e-80	hypothetical protein (528 aa)
PST130_10995_1
PST130_10995_6				GO:0008150 GO:0016491 GO:0003674	external nadh-ubiquinone oxidoreductase 1		8874	8e-14	external NADH-ubiquinone oxidoreductase 1, mitochondrial precursor (587 aa)
PST130_10996_2	PF02390.11	Methyltransf_4	1e-21	GO:0003723 GO:0016740 GO:0016070	methyltransferase-like protein 1		9861	2e-88	m7G tRNA methyltransferase (338 aa)
PST130_10997_1							5473	1e-10	hypothetical protein (478 aa)
PST130_10999_1
PST130_11_1	PF02936.8	COX4	5.9e-15	GO:0005215 GO:0016491	cytochrome c oxidase subunit		6603	2e-36	hypothetical protein (199 aa)
PST130_1100_1							7582	8e-06	predicted protein (143 aa)
PST130_11001_1							19632	2e-39	hypothetical protein (255 aa)
PST130_11002_1
PST130_11002_2
PST130_11002_4							83	2e-23	hypothetical protein (98 aa)
PST130_11004_2	PF06391.7	MAT1	0.0024				13531	2e-84	RNA polymerase II transcription factor B subunit 3 (411 aa)
PST130_11004_3
PST130_11007_1							14607	2e-30	predicted protein (518 aa)
PST130_11007_3							14418	1e-21	predicted protein (136 aa)
PST130_11009_1
PST130_1101_1							13559	4e-06	predicted protein (744 aa)
PST130_11011_1							18523	0	predicted protein (985 aa)
PST130_11013_2							18523	1e-38	predicted protein (985 aa)
PST130_11013_4	PF00085.14	Thioredoxin	7.7e-10				4367	2e-140	monothiol glutaredoxin-4 (272 aa)
PST130_11014_2
PST130_11016_1				GO:0003674 GO:0016787	pre-mrna-splicing factor atp-dependent rna helicase prp16		3729	4e-124	pre-mRNA-splicing factor ATP-dependent RNA helicase PRP16 (1057 aa)
PST130_11016_2	PF00134.17	Cyclin_N	6.8e-08				3730	2e-86	hypothetical protein similar to cyclin Ctk2 (400 aa)
PST130_11017_1
PST130_11017_3	PF02992.8	Transposase_21	8.4e-13				9743	2e-43	predicted protein (1332 aa)
PST130_11018_4							7226	5e-20	predicted protein (834 aa)
PST130_11019_1	PF01222.11	ERG4_ERG24	4e-58				17808	2e-118	Delta(24(24(1)))-sterol reductase )-reductase) sterol reductase) (468 aa)
PST130_11019_5	PF07145.9	PAM2	0.005				1646	7e-10	predicted protein (1132 aa)
PST130_11020_2	PF12937.1	F-box-like	0.0024				9849	2e-34	predicted protein (512 aa)
PST130_11020_3
PST130_11021_1							20499	1e-19	predicted protein (220 aa)
PST130_11023_3							7647	2e-39	predicted protein (689 aa)
PST130_11024_1	PF11221.2	Med21	4.2e-09				8300	1e-29	hypothetical protein (190 aa)
PST130_11024_2							3733	3e-11	hypothetical protein similar to UDP-N-acetylglucosaminyltransferase (1595 aa)
PST130_11024_5	PF00155.15	Aminotran_1_2	0.00028	GO:0003674 GO:0006519 GO:0008150 GO:0016740	aspartate aminotransferase		13064	1e-11	aspartate aminotransferase, mitochondrial precursor (429 aa)
PST130_11025_2							5868	3e-59	predicted protein (463 aa)
PST130_11025_3							15273	1e-55	predicted protein (497 aa)
PST130_11026_3	PF00080.14	Sod_Cu	7.7e-17				5675	6e-106	hypothetical protein (343 aa)
PST130_11027_1							13182	1e-27	predicted protein (702 aa)
PST130_11027_2							11868	2e-15	predicted protein (180 aa)
PST130_11028_1							845	1e-54	predicted protein (262 aa)
PST130_11028_3							10188	8e-22	predicted protein (894 aa)
PST130_11029_3	PF03388.7	Lectin_leg-like	5.8e-07			GH737476.1	12132	6e-61	conserved hypothetical protein (346 aa)
PST130_11030_1							15138	1e-32	predicted protein (777 aa)
PST130_11030_2	PF03169.9	OPT	1.1e-08				15138	3e-163	predicted protein (777 aa)
PST130_11031_2	PF03184.13	DDE_1	2.8e-25				15630	2e-07	hypothetical protein (750 aa)
PST130_11031_3	PF09607.4	BrkDBD	0.0001				374	3e-22	conserved hypothetical protein (355 aa)
PST130_11033_2						GH737798.1	3975	2e-14	predicted protein (120 aa)
PST130_11034_1							4096	3e-27	predicted protein (484 aa)
PST130_11037_1	PF00171.1	Aldedh	2.9e-76				15008	0	aldehyde dehydrogenase (501 aa)
PST130_11040_1
PST130_11044_1							6728	2e-11	predicted protein (600 aa)
PST130_11044_2							14513	4e-11	predicted protein (274 aa)
PST130_11046_1
PST130_11046_3	PF12856.1	Apc9	0.0028				6349	1e-38	predicted protein (115 aa)
PST130_11046_4							14108	8e-13	predicted protein (181 aa)
PST130_11047_3							14928	6e-16	predicted protein (869 aa)
PST130_11048_3	PF12532.2	DUF3732	0.0096				11287	2e-39	hypothetical protein (423 aa)
PST130_11049_2							4100	3e-62	predicted protein (665 aa)
PST130_11050_2	PF00752.11	XPG_N	1.4e-17	GO:0003674	dna-repair protein rad2		4137	2e-171	DNA-repair protein rad2 (460 aa)
PST130_11051_1							10512	5e-16	predicted protein (412 aa)
PST130_11052_1
PST130_11053_1
PST130_11057_4
PST130_11057_5
PST130_11059_1							14285	6e-35	predicted protein (401 aa)
PST130_11059_2
PST130_11060_1
PST130_11060_2							17595	3e-19	predicted protein (262 aa)
PST130_11060_3						GH737802.1	18457	6e-20	hypothetical protein similar to KIN17 protein (405 aa)
PST130_11061_5
PST130_11062_1	PF03164.8	Mon1	2.7e-20	GO:0005737 GO:0016020 GO:0005575	protein-vacuolar targeting		3945	1e-14	conserved hypothetical protein (463 aa)
PST130_11062_2	PF03164.8	Mon1	1.3e-07				3945	6e-25	conserved hypothetical protein (463 aa)
PST130_11063_1	PF03344.9	Daxx	0.0078				13252	7e-51	hypothetical protein (386 aa)
PST130_11064_2
PST130_11065_1	PF05699.8	Dimer_Tnp_hAT	5.3e-12				10009	7e-49	predicted protein (676 aa)
PST130_11066_2
PST130_11066_3
PST130_11067_1							2088	3e-18	predicted protein (263 aa)
PST130_11067_2						GH737798.1	19165	5e-09	predicted protein (136 aa)
PST130_11069_1						GH737574.1
PST130_11069_2
PST130_11070_3	PF11705.2	RNA_pol_3_Rpc31	5.3e-15				3832	4e-76	hypothetical protein (281 aa)
PST130_11076_1				GO:0016874	ubiquitin-protein ligase		8291	8e-46	conserved hypothetical protein (1956 aa)
PST130_11080_2
PST130_11081_1							15605	5e-13	ATP synthase subunit alpha (560 aa)
PST130_11083_1
PST130_11083_3						GH737828.1	639	4e-15	predicted protein (218 aa)
PST130_11084_1							3516	3e-09	hypothetical protein (1725 aa)
PST130_11085_1							8950	2e-18	predicted protein (892 aa)
PST130_11085_2							8950	6e-61	predicted protein (892 aa)
PST130_11086_1							19122	9e-19	predicted protein (575 aa)
PST130_11089_1
PST130_11089_5							18814	2e-39	predicted protein (171 aa)
PST130_11089_6	PF00415.12	RCC1	1.7e-08				16009	2e-46	predicted protein (493 aa)
PST130_11089_7
PST130_11089_9							611	3e-55	hypothetical protein (404 aa)
PST130_11090_2							14839	3e-68	predicted protein (351 aa)
PST130_11091_1							5377	3e-37	chloride channel protein 4 (931 aa)
PST130_11092_3	PF00226.25	DnaJ	9.4e-23	GO:0003674	chaperone protein dnaj	GH737378.1	367	0	chaperone protein dnaJ (582 aa)
PST130_11094_3
PST130_11096_1							20001	4e-21	Set1 complex component swd1 (528 aa)
PST130_11096_2							7937	1e-16	conserved hypothetical protein (3225 aa)
PST130_11096_3							7937	2e-17	conserved hypothetical protein (3225 aa)
PST130_11097_4							13493	8e-08	predicted protein (169 aa)
PST130_111_1							14966	1e-40	predicted protein (891 aa)
PST130_11100_1	PF00782.14	DSPc	6.1e-06				746	2e-112	hypothetical protein (617 aa)
PST130_11101_2	PF12128.2	DUF3584	0.0033
PST130_11101_3
PST130_11103_3	PF07646.9	Kelch_2	0.00097				5369	0	tip elongation aberrant protein 1 (1531 aa)
PST130_11104_2	PF01805.14	Surp	4.5e-13				1286	0	hypothetical protein similar to splicing factor 3a (879 aa)
PST130_11105_1	PF04177.6	TAP42	7.7e-06				16770	1e-11	hypothetical protein similar to TapA (391 aa)
PST130_11106_2
PST130_11106_4						GH737831.1	6461	6e-14	conserved hypothetical protein (410 aa)
PST130_11106_6
PST130_11107_2				GO:0016020 GO:0016740 GO:0044255	phosphatidylinositol synthase		1285	2e-15	hypothetical protein similar to phosphatidylinositol synthase (251 aa)
PST130_11107_3
PST130_11108_2	PF05922.10	Inhibitor_I9	2.5e-07				14079	2e-17	hypothetical protein (141 aa)
PST130_11108_4
PST130_11109_2							20153	1e-43	predicted protein (1225 aa)
PST130_11109_4							13974	0	predicted protein (889 aa)
PST130_11110_2
PST130_11110_3	PF02230.10	Abhydrolase_2	1.6e-29				11305	2e-53	predicted protein (300 aa)
PST130_11113_1
PST130_11114_3	PF00227.1	Proteasome	3.2e-23	GO:0005575 GO:0008233 GO:0044257	proteasome subunit beta type-4		18823	8e-122	proteasome subunit beta type-4 precursor (265 aa)
PST130_11115_2							19902	6e-09	predicted protein (286 aa)
PST130_11116_1				GO:0006950 GO:0006259 GO:0003677 GO:0003674	flap structure-specific endonuclease		17170	5e-62	flap structure-specific endonuclease (1393 aa)
PST130_11117_1							14149	6e-27	predicted protein (333 aa)
PST130_11117_2
PST130_11117_3	PF02036.11	SCP2	1.6e-18				14151	4e-80	hypothetical protein (185 aa)
PST130_11118_3						GH737542.1	5626	1e-62	predicted protein (1088 aa)
PST130_11120_3
PST130_11121_1							16686	0	sortilin precursor (1565 aa)
PST130_11121_2							18332	3e-09	predicted protein (1037 aa)
PST130_11122_1	PF02992.8	Transposase_21	1e-06				775	2e-31	predicted protein (1057 aa)
PST130_11124_1
PST130_11124_2
PST130_11125_1
PST130_11126_1							9034	3e-06	predicted protein (187 aa)
PST130_11126_4
PST130_1113_2	PF01907.13	Ribosomal_L37e	6.2e-26	GO:0005840 GO:0003674 GO:0005198 GO:0006412 GO:0003723	60s ribosomal protein l37		8311	2e-36	hypothetical protein (95 aa)
PST130_1113_3	PF00240.17	ubiquitin	6.1e-33	GO:0005840 GO:0005198 GO:0006412	ubiquitin 40s ribosomal protein s27a fusion	GH737195.1	8310	5e-71	ubiquitin (160 aa)
PST130_1113_5	PF01459.16	Porin_3	1.6e-11	GO:0006810	mitochondrial import receptor subunit		2724	4e-34	hypothetical protein similar to outer membrane protein (381 aa)
PST130_1113_7
PST130_11130_1							1149	8e-44	predicted protein (357 aa)
PST130_11130_5							1764	2e-76	hypothetical protein (525 aa)
PST130_11130_6
PST130_11132_1	PF03663.8	Glyco_hydro_76	3.4e-44				3566	9e-123	conserved hypothetical protein (455 aa)
PST130_11133_1
PST130_11134_2
PST130_11134_5	PF05875.6	Ceramidase	0.00011				14750	3e-33	hypothetical protein similar to ceramidase (304 aa)
PST130_11135_2
PST130_11136_1	PF00891.12	Methyltransf_2	1.2e-28				1744	0	predicted protein (456 aa)
PST130_11137_2							13387	7e-28	predicted protein (447 aa)
PST130_11137_3
PST130_11140_1
PST130_11140_2
PST130_11140_3							9647	3e-09	predicted protein (119 aa)
PST130_11141_1							13683	3e-12	predicted protein (961 aa)
PST130_11142_1							4972	2e-15	predicted protein (357 aa)
PST130_11142_3	PF01480.11	PWI	5.6e-27
PST130_11144_1	PF00271.25	Helicase_C	0.0031				12051	0	ATP-dependent DNA helicase recQ (615 aa)
PST130_11145_2
PST130_11145_3							15661	2e-23	hypothetical protein similar to DNA binding (420 aa)
PST130_11145_4
PST130_11145_5	PF06687.6	SUR7	0.00012				20112	6e-92	predicted protein (394 aa)
PST130_11146_2
PST130_11147_1	PF01106.11	NifU	7e-21	GO:0019725 GO:0051186 GO:0003674 GO:0005739	iron-sulfur cluster scaffold protein nfu		781	7e-69	hypothetical protein similar to iron-sulfur cluster scaffold protein Nfu (358 aa)
PST130_11148_1							8523	2e-23	conserved hypothetical protein (2515 aa)
PST130_11148_2
PST130_11148_3							8523	1e-34	conserved hypothetical protein (2515 aa)
PST130_11148_4							8523	4e-16	conserved hypothetical protein (2515 aa)
PST130_11148_6							8523	5e-65	conserved hypothetical protein (2515 aa)
PST130_11149_1
PST130_1115_1	PF02992.8	Transposase_21	2e-17				4619	4e-159	predicted protein (1406 aa)
PST130_11150_1
PST130_11151_2
PST130_11151_3
PST130_11151_5
PST130_11152_2							510	5e-14	hypothetical protein similar to rad16 (1154 aa)
PST130_11154_1
PST130_11158_4							1972	5e-32	predicted protein (333 aa)
PST130_11159_2				GO:0003674 GO:0005575 GO:0008150 GO:0005737	temporarily assigned name protein 182		4115	2e-144	hypothetical protein similar to temporarily assigned gene name protein 182 (1258 aa)
PST130_1116_1
PST130_1116_2							368	0	predicted protein (492 aa)
PST130_11160_1							14609	2e-61	hypothetical protein (501 aa)
PST130_11160_2							14609	3e-08	hypothetical protein (501 aa)
PST130_11161_1
PST130_11162_1	PF11718.2	CPSF73-100_C	4e-14	GO:0016787	endoribonuclease ysh1		1491	5e-56	endoribonuclease YSH1 (795 aa)
PST130_11162_2						GH738052.1	1243	1e-17	predicted protein (119 aa)
PST130_11162_3
PST130_11168_2
PST130_11168_3
PST130_11170_1
PST130_11170_2							6824	2e-23	conserved hypothetical protein (1487 aa)
PST130_11170_5							10346	9e-50	predicted protein (311 aa)
PST130_11171_3				GO:0007165 GO:0030234 GO:0005575	ras gtpase-activating protein		6199	1e-14	hypothetical protein similar to ras GTPase-activating protein (878 aa)
PST130_11172_3
PST130_11172_4	PF01425.15	Amidase	8.6e-27	GO:0003674	glutamyl-trna amidotransferase subunit a	GH737708.1	19798	1e-31	glutamyl-tRNA(Gln) amidotransferase subunit A (405 aa)
PST130_11172_5
PST130_11173_1	PF00986.15	DNA_gyraseB_C	0.0085				10413	1e-21	protein rds1 (302 aa)
PST130_11175_1	PF00069.19	Pkinase	6.2e-64	GO:0004672 GO:0008150 GO:0003674	ste ste20 ysk protein kinase		19994	0	serine/threonine-protein kinase 3 (827 aa)
PST130_11176_3
PST130_11176_5	PF01779.11	Ribosomal_L29e	1.2e-23	GO:0005730 GO:0005198 GO:0005840 GO:0006412	60s ribosomal protein l29		12814	1e-24	hypothetical protein (63 aa)
PST130_11179_2							3538	1e-08	predicted protein (359 aa)
PST130_11179_3	PF12776.1	Myb_DNA-bind_3	3.9e-11				6949	2e-31	predicted protein (381 aa)
PST130_11180_1							13572	9e-16	predicted protein (504 aa)
PST130_11180_2							13010	2e-23	predicted protein (164 aa)
PST130_11183_1	PF04997.6	RNA_pol_Rpb1_1	0.006	GO:0016740	dna-directed rna polymerase i subunit rpa1		6293	0	DNA-directed RNA polymerase I subunit RPA1 (1888 aa)
PST130_11184_1							16943	1e-19	predicted protein (429 aa)
PST130_11186_1
PST130_11186_2
PST130_11186_3	PF00352.15	TBP	0.00041	GO:0003677 GO:0030528 GO:0016070 GO:0006350 GO:0070271 GO:0003674	tata-box-binding protein		1493	2e-40	TATA-box-binding protein (210 aa)
PST130_11186_4
PST130_11186_5
PST130_11189_1							3038	3e-11	predicted protein (449 aa)
PST130_1119_1	PF00171.1	Aldedh	5.6e-34	GO:0008150 GO:0016491	aldehyde dehydrogenase		15008	4e-87	aldehyde dehydrogenase (501 aa)
PST130_1119_2	PF00171.1	Aldedh	1.8e-32	GO:0008150 GO:0016491	aldehyde dehydrogenase		15008	4e-41	aldehyde dehydrogenase (501 aa)
PST130_11190_3						GH737798.1	5906	1e-14	predicted protein (236 aa)
PST130_11191_2							8766	1e-10	predicted protein (205 aa)
PST130_11191_3							4499	4e-14	hypothetical protein similar to transposase (730 aa)
PST130_11192_1							12609	5e-06	predicted protein (288 aa)
PST130_11192_2							14299	4e-39	predicted protein (1167 aa)
PST130_11193_1							2366	4e-47	predicted protein (578 aa)
PST130_11193_2	PF10433.3	MMS1_N	4.3e-14	GO:0016070 GO:0003674 GO:0005634 GO:0007049	pre-mrna-splicing factor rse1		12824	3e-60	pre-mRNA-splicing factor RSE1 (1214 aa)
PST130_11193_3							11302	1e-10	predicted protein (369 aa)
PST130_11193_5	PF02816.1	Alpha_kinase	5.5e-22				4544	3e-30	predicted protein (589 aa)
PST130_11194_1							8178	1e-24	predicted protein (459 aa)
PST130_11197_1							48	3e-37	predicted protein (536 aa)
PST130_1120_1
PST130_11200_3							1891	7e-17	predicted protein (152 aa)
PST130_11203_1							11062	6e-24	hypothetical protein (550 aa)
PST130_11203_2							20346	2e-60	predicted protein (435 aa)
PST130_11203_3							8633	1e-44	predicted protein (919 aa)
PST130_11206_1							7061	2e-06	hypothetical protein (537 aa)
PST130_11209_1							18812	2e-09	hypothetical protein (141 aa)
PST130_11209_2
PST130_11210_1	PF03635.11	Vps35	6.1e-166				10018	0	vacuolar protein sorting-associated protein 35 (925 aa)
PST130_11215_1							6186	4e-43	predicted protein (1328 aa)
PST130_11215_2							6186	2e-53	predicted protein (1328 aa)
PST130_11216_2
PST130_11216_3	PF00324.15	AA_permease	3.6e-11	GO:0006810	amino acid permease		3181	3e-74	hypothetical protein similar to amino acid permease (586 aa)
PST130_11216_4	PF00324.15	AA_permease	5.3e-06	GO:0006810	amino acid permease		3181	7e-70	hypothetical protein similar to amino acid permease (586 aa)
PST130_11217_4	PF03467.9	Smg4_UPF3	2.6e-24				11334	3e-103	hypothetical protein (489 aa)
PST130_11218_1
PST130_11218_2
PST130_1122_1							9450	8e-33	predicted protein (468 aa)
PST130_1122_2	PF04827.8	Plant_tran	0.0003
PST130_11221_10
PST130_11221_14							16869	9e-14	predicted protein (369 aa)
PST130_11221_9
PST130_11224_2	PF01545.15	Cation_efflux	1.9e-16	GO:0006810	cdf-like metal transporter
PST130_11225_1	PF00438.14	S-AdoMet_synt_N	5.8e-42	GO:0005737 GO:0008150 GO:0016740 GO:0003674	s-adenosylmethionine synthetase		11729	0	S-adenosylmethionine synthetase (400 aa)
PST130_11228_1							11094	6e-06	predicted protein (482 aa)
PST130_1123_1
PST130_11231_2							19697	2e-88	predicted protein (411 aa)
PST130_11232_4	PF10497.3	zf-4CXXC_R1	6.6e-06				995	8e-91	predicted protein (668 aa)
PST130_11232_6	PF01237.12	Oxysterol_BP	8.8e-32				986	1e-68	hypothetical protein similar to oxysterol-binding protein family (432 aa)
PST130_11237_1	PF05183.6	RdRP	1.2e-58				9533	2e-82	hypothetical protein similar to RNA-directed RNA polymerase Rdp1 (1237 aa)
PST130_11237_2	PF01652.12	IF4E	9.1e-43				9532	4e-86	eukaryotic translation initiation factor 4E (706 aa)
PST130_11238_1							4094	2e-74	DNA repair protein RAD50 (1292 aa)
PST130_11238_3	PF11559.2	ADIP	0.0041				4094	7e-79	DNA repair protein RAD50 (1292 aa)
PST130_11239_1	PF12656.1	G-patch_2	7.7e-24				6490	8e-97	hypothetical protein (402 aa)
PST130_11241_1							6074	3e-35	conserved hypothetical protein (435 aa)
PST130_11241_2	PF00012.14	HSP70	1.6e-156	GO:0003674	heat shock		6075	0	heat shock protein Hsp88 (784 aa)
PST130_11242_1
PST130_11245_1	PF05691.6	Raffinose_syn	5.3e-07				6805	2e-102	conserved hypothetical protein (1117 aa)
PST130_11245_2	PF00005.21	ABC_tran	7.3e-17				6804	2e-70	ATP-binding cassette sub-family B member 10, mitochondrial precursor (713 aa)
PST130_11245_3
PST130_11246_2							10009	2e-17	predicted protein (676 aa)
PST130_11247_3							7969	2e-07	elongation factor 2 (843 aa)
PST130_11248_3							3554	1e-08	helicase SWR1 (1765 aa)
PST130_11250_1							4100	5e-35	predicted protein (665 aa)
PST130_11251_3							1668	1e-94	conserved hypothetical protein (970 aa)
PST130_11251_6							19635	7e-24	predicted protein (541 aa)
PST130_11251_7							2246	1e-23	predicted protein (582 aa)
PST130_11253_2
PST130_11253_3							7752	5e-122	predicted protein (594 aa)
PST130_11254_1	PF05699.8	Dimer_Tnp_hAT	1.4e-09				5889	4e-90	predicted protein (784 aa)
PST130_11255_2	PF00133.16	tRNA-synt_1	0.00054	GO:0016874 GO:0016070 GO:0006412 GO:0006519 GO:0008150 GO:0003674 GO:0005737	valyl-trna synthetase		15665	5e-15	valyl-tRNA synthetase (1073 aa)
PST130_11257_3	PF00590.14	TP_methylase	5.3e-16	GO:0006464 GO:0016740	diphthine synthase		12290	7e-115	diphthine synthase (305 aa)
PST130_11258_1	PF00365.14	PFK	4.7e-13	GO:0005737 GO:0016740 GO:0008150	6-phosphofructokinase [Puccinia graminis f. sp. tritici CRL 75-36-700-3]		5736	2e-127	6-phosphofructokinase (863 aa)
PST130_11262_1							8441	4e-22	hypothetical protein (466 aa)
PST130_11263_1	PF09724.3	DUF2036	4.6e-30				4233	4e-156	predicted protein (450 aa)
PST130_11264_1	PF00962.16	A_deaminase	8.6e-62	GO:0006725 GO:0046483 GO:0016787	amp deaminase		2391	3e-136	adenosine monophosphate deaminase (900 aa)
PST130_11265_2							7871	1e-06	predicted protein (121 aa)
PST130_11266_4
PST130_11267_3	PF03663.8	Glyco_hydro_76	3.7e-53				3545	0	hypothetical protein similar to glycosyl hydrolase (473 aa)
PST130_11268_3	PF08783.5	DWNN	7.7e-32	GO:0003674 GO:0005634 GO:0005515	zinc knuckle domain-containing protein		14713	3e-84	hypothetical protein (177 aa)
PST130_11268_4	PF00098.17	zf-CCHC	0.00052	GO:0003674	hypothetical protein PGTG_14712 [Puccinia graminis f. sp. tritici CRL 75-36-700-3]		14712	3e-29	conserved hypothetical protein (663 aa)
PST130_11269_2
PST130_11270_2
PST130_11270_4	PF00026.17	Asp	3.6e-60				3966	4e-92	hypothetical protein similar to aspartic protease precursor (457 aa)
PST130_11271_2	PF07992.8	Pyr_redox_2	2.2e-18				6612	0	conserved hypothetical protein (606 aa)
PST130_11274_1							16474	1e-21	conserved hypothetical protein (426 aa)
PST130_11274_2
PST130_11275_2
PST130_11275_3							9357	2e-11	predicted protein (665 aa)
PST130_11275_4	PF00505.13	HMG_box	0.00026				12110	4e-82	hypothetical protein (301 aa)
PST130_11275_6
PST130_11276_1
PST130_11276_2
PST130_11277_4
PST130_11277_5							5774	1e-09	predicted protein (154 aa)
PST130_11277_6
PST130_11277_7	PF00076.16	RRM_1	1.6e-07				18709	2e-63	predicted protein (492 aa)
PST130_11277_8
PST130_11278_2
PST130_11278_3							12900	1e-06	predicted protein (103 aa)
PST130_11279_1
PST130_1128_1							6542	4e-32	ATP-dependent DNA helicase recQ (613 aa)
PST130_11280_4	PF08241.6	Methyltransf_11	0.0028				4654	4e-35	tRNA (uracil-5-)-methyltransferase TRM9 (282 aa)
PST130_11282_2							5181	2e-06	predicted protein (121 aa)
PST130_11282_3	PF04646.6	DUF604	4.9e-13				15317	2e-163	predicted protein (530 aa)
PST130_11282_5
PST130_11283_1
PST130_11284_2	PF12796.1	Ank_2	4.4e-07				190	1e-41	predicted protein (195 aa)
PST130_11285_3	PF00733.15	Asn_synthase	1.4e-50				3697	0	hypothetical protein similar to asparagine synthetase domain containing 1 (576 aa)
PST130_11285_4	PF10187.3	Nefa_Nip30_N	1.3e-22				3696	1e-45	predicted protein (264 aa)
PST130_11286_1	PF01764.1	Lipase_3	3.5e-10				4271	0	conserved hypothetical protein (1358 aa)
PST130_11287_3							7557	3e-11	predicted protein (525 aa)
PST130_11289_1							9050	7e-09	hypothetical protein similar to transcription factor TFIIH complex subunit Tfb1 (611 aa)
PST130_11290_1	PF03031.12	NIF	8.7e-17				8307	2e-64	hypothetical protein (439 aa)
PST130_11292_2							6392	9e-29	hypothetical protein (91 aa)
PST130_11294_1						GH737624.1	19475	3e-36	predicted protein (1111 aa)
PST130_11295_3
PST130_11296_3	PF09127.5	Leuk-A4-hydro_C	1.6e-37	GO:0003674 GO:0016787	aminopeptidase b (ap-b) (arginyl aminopeptidase)		9219	1e-93	hypothetical protein similar to leukotriene A4 hydrolase (627 aa)
PST130_11297_2							3455	4e-21	predicted protein (349 aa)
PST130_11297_3							3455	1e-25	predicted protein (349 aa)
PST130_11297_5							3458	3e-48	hypothetical protein (366 aa)
PST130_11297_6							3458	9e-20	hypothetical protein (366 aa)
PST130_11297_9							610	1e-70	hypothetical protein (408 aa)
PST130_11299_1	PF08704.4	GCD14	4.8e-12	GO:0016070 GO:0016740 GO:0005737 GO:0005634	trna methyltransferase complex subunit cpd1		4078	9e-49	hypothetical protein similar to tRNA methyltransferase complex subunit Cpd1 (402 aa)
PST130_1130_1							5507	4e-20	predicted protein (497 aa)
PST130_11300_1
PST130_11301_1
PST130_11302_6							11253	2e-106	predicted protein (1131 aa)
PST130_11304_2							18249	3e-31	predicted protein (295 aa)
PST130_11305_3
PST130_11306_1
PST130_11307_4
PST130_11308_1							10665	1e-31	predicted protein (187 aa)
PST130_11308_2						GH738308.1	2156	2e-10	predicted protein (123 aa)
PST130_11309_3							18946	7e-83	predicted protein (1248 aa)
PST130_11310_1							1586	2e-08	predicted protein (536 aa)
PST130_11310_2
PST130_11310_3							13794	1e-08	predicted protein (425 aa)
PST130_11311_1							16853	2e-17	predicted protein (337 aa)
PST130_11314_2	PF05764.7	YL1	0.0084
PST130_11316_1	PF05183.6	RdRP	4.5e-32				17766	0	hypothetical protein similar to RNA-directed RNA polymerase 1 (1189 aa)
PST130_11318_1
PST130_11318_3
PST130_11319_3
PST130_11320_2	PF03221.10	HTH_Tnp_Tc5	1.3e-11				374	4e-63	conserved hypothetical protein (355 aa)
PST130_11321_1							105	1e-09	predicted protein (782 aa)
PST130_11321_2							13486	2e-39	predicted protein (745 aa)
PST130_11324_10							5485	3e-75	hypothetical protein (876 aa)
PST130_11324_4	PF00022.13	Actin	2.2e-159	GO:0005737 GO:0008150 GO:0005856 GO:0005515 GO:0003674	actin [Puccinia graminis f. sp. tritici CRL 75-36-700-3]		5488	0	actin (376 aa)
PST130_11324_6							18706	7e-31	predicted protein (250 aa)
PST130_11324_7
PST130_11324_8
PST130_11326_2	PF10309.3	DUF2414	0.0069				2296	3e-149	predicted protein (578 aa)
PST130_11326_3				GO:0016740	dolichyl-phosphate mannosyltransferase polypeptide 1		2297	5e-19	hypothetical protein similar to dolichyl-phosphate mannosyltransferase polypeptide 1 (264 aa)
PST130_1133_1							6728	9e-16	predicted protein (600 aa)
PST130_11332_1							9094	4e-81	hypothetical protein (621 aa)
PST130_11333_1							16230	2e-26	hypothetical protein similar to vacuolar protein (617 aa)
PST130_11333_2	PF09495.4	DUF2462	5.2e-10				16229	1e-31	hypothetical protein (88 aa)
PST130_11333_3	PF06201.7	PITH	7.7e-21				16228	7e-75	hypothetical protein (240 aa)
PST130_11333_6							16226	4e-55	conserved hypothetical protein (636 aa)
PST130_11336_1				GO:0003674	splicing factor 3b subunit 4		13217	9e-18	spliceosome-associated protein 49 (351 aa)
PST130_1134_1							10583	2e-08	hypothetical protein similar to ATPase (1197 aa)
PST130_11343_1	PF00330.14	Aconitase	1.9e-111	GO:0008150 GO:0016829	aconitate hydratase		3886	0	aconitate hydratase, mitochondrial precursor (830 aa)
PST130_11346_1	PF06862.6	DUF1253	9.7e-55	GO:0005634	digestive organ expansion factor		5375	1e-70	hypothetical protein similar to family protein (699 aa)
PST130_11346_2	PF04180.8	LTV	1.8e-34				5376	7e-44	hypothetical protein similar to cytoplasm protein (544 aa)
PST130_11347_1							1780	6e-27	predicted protein (520 aa)
PST130_11347_4	PF00447.11	HSF_DNA-bind	2.8e-33	GO:0030528 GO:0006350 GO:0006950 GO:0016070 GO:0003677 GO:0005634 GO:0005737	transcription factor hsf1		6588	1e-134	heat shock factor protein 4 (805 aa)
PST130_11352_1	PF00271.25	Helicase_C	1.4e-06				3420	4e-109	ATP-dependent DNA helicase recQ (756 aa)
PST130_11353_1
PST130_11353_2							662	1e-14	hypothetical protein similar to prp8-PA (2389 aa)
PST130_11355_1	PF03807.11	F420_oxidored	2.1e-08	GO:0008150 GO:0003674	pyrroline-5-carboxylate reductase		1617	1e-142	pyrroline-5-carboxylate reductase (317 aa)
PST130_11357_1							19476	1e-13	predicted protein (1014 aa)
PST130_11357_2
PST130_11359_3
PST130_1136_1							5596	3e-18	conserved hypothetical protein (672 aa)
PST130_11360_4
PST130_11361_2
PST130_11362_3							8059	1e-16	predicted protein (443 aa)
PST130_11366_1
PST130_11366_3	PF03871.8	RNA_pol_Rpb5_N	3.3e-23	GO:0008150 GO:0016779	dna-directed rna polymerases i		6512	5e-35	DNA-directed RNA polymerases I (205 aa)
PST130_11368_1	PF07798.5	DUF1640	4.2e-14	GO:0016740 GO:0008150 GO:0016020	mitochondrial protein		3195	5e-92	conserved hypothetical protein (419 aa)
PST130_11369_2
PST130_11369_4							9719	9e-31	predicted protein (530 aa)
PST130_11369_5
PST130_1137_1							611	4e-37	hypothetical protein (404 aa)
PST130_1137_2							611	7e-55	hypothetical protein (404 aa)
PST130_11371_1							6589	4e-43	predicted protein (397 aa)
PST130_11372_3	PF12678.1	zf-rbx1	1.3e-11				792	5e-12	predicted protein (383 aa)
PST130_11373_2
PST130_11374_1	PF00069.19	Pkinase	6e-53	GO:0008150 GO:0006464 GO:0003674 GO:0004672	cmgc gsk protein kinase		1413	0	glycogen synthase kinase-3 beta (416 aa)
PST130_11375_3	PF00254.22	FKBP_C	1.2e-30	GO:0006457 GO:0005634 GO:0016853	fk506-binding protein		9128	2e-85	FK506-binding protein (432 aa)
PST130_11375_4							9124	3e-32	hypothetical protein (193 aa)
PST130_11376_1							19422	2e-66	predicted protein (631 aa)
PST130_11377_2
PST130_11377_3
PST130_11377_4							4882	2e-15	conserved hypothetical protein (923 aa)
PST130_11379_4
PST130_11380_2	PF03901.11	Glyco_transf_22	3.1e-08				3644	2e-173	hypothetical protein similar to asparagine-linked glycosylation 12 (543 aa)
PST130_11380_4	PF04733.8	Coatomer_E	2.9e-33				3640	4e-146	conserved hypothetical protein (323 aa)
PST130_11381_5
PST130_11383_1							6023	1e-07	hypothetical protein similar to transformer-2-beta isoform 3 (278 aa)
PST130_11384_1	PF00063.15	Myosin_head	5.3e-222	GO:0004386 GO:0003674 GO:0005515 GO:0005856 GO:0003774 GO:0005938	myosin ic heavy chain		428	0	myosin IC heavy chain (1304 aa)
PST130_11384_2							429	2e-26	predicted protein (142 aa)
PST130_11384_4	PF12678.1	zf-rbx1	0.00034				3206	2e-06	predicted protein (255 aa)
PST130_11384_7	PF00069.19	Pkinase	0.0057				435	0	serine/threonine-protein kinase Pim-2 (594 aa)
PST130_11384_8							3518	3e-58	predicted protein (444 aa)
PST130_11385_1							16133	1e-92	predicted protein (1131 aa)
PST130_11386_1						GH737076.1	20018	8e-62	predicted protein (802 aa)
PST130_11387_1
PST130_11390_2							10014	5e-06	predicted protein (174 aa)
PST130_11391_3
PST130_11393_1						GH737076.1	13559	2e-180	predicted protein (744 aa)
PST130_11393_2							13559	2e-35	predicted protein (744 aa)
PST130_11394_1							6163	7e-56	conserved hypothetical protein (428 aa)
PST130_11396_1							11767	1e-162	hypothetical protein similar to cleavage and polyadenylation specific protein (1489 aa)
PST130_11397_1	PF00044.18	Gp_dh_N	5.1e-61	GO:0005737 GO:0003674 GO:0008150 GO:0006091 GO:0044262 GO:0016491	glyceraldehyde-3-phosphate dehydrogenase		4956	4e-80	glyceraldehyde-3-phosphate dehydrogenase (335 aa)
PST130_11397_3	PF01014.1	Uricase	1.4e-06				4959	5e-15	uricase (308 aa)
PST130_11398_2	PF05597.5	Phasin	0.0032				11727	3e-30	predicted protein (325 aa)
PST130_11400_2						GH737397.1	10077	9e-60	hypothetical protein (627 aa)
PST130_11401_2							6403	6e-32	predicted protein (738 aa)
PST130_11402_1
PST130_11403_1
PST130_11404_2							19984	4e-57	hypothetical protein similar to DNA binding (397 aa)
PST130_11404_3
PST130_11406_1							19577	8e-11	predicted protein (226 aa)
PST130_11407_3							10051	5e-22	predicted protein (178 aa)
PST130_11407_5							6667	9e-15	hypothetical protein (305 aa)
PST130_11408_4	PF00467.23	KOW	2.4e-06	GO:0003674 GO:0003723 GO:0006412 GO:0006464 GO:0006519	eukaryotic translation initiation factor 5a		9986	2e-61	eukaryotic translation initiation factor 5A (114 aa)
PST130_11408_7
PST130_11409_1
PST130_11409_2							2177	1e-108	predicted protein (471 aa)
PST130_1141_1							15628	4e-07	hypothetical protein (177 aa)
PST130_1141_5							15628	2e-54	hypothetical protein (177 aa)
PST130_11410_1	PF02373.16	JmjC	0.008				744	2e-34	E3 ubiquitin-protein ligase NEDD4 (4198 aa)
PST130_11410_2							6508	2e-76	hypothetical protein similar to 3'-5' exoribonuclease (2060 aa)
PST130_11410_3				GO:0005215 GO:0016020 GO:0006810	3 -5 exoribonuclease		6508	6e-105	hypothetical protein similar to 3'-5' exoribonuclease (2060 aa)
PST130_11411_1
PST130_11415_1							1555	1e-20	hypothetical protein (394 aa)
PST130_11416_1
PST130_11416_2						GH737066.1
PST130_11416_7							8444	3e-42	hypothetical protein similar to alanyl dipeptidyl peptidase (638 aa)
PST130_11417_1
PST130_11417_3	PF00300.1	His_Phos_1	2.1e-11				2959	5e-64	hypothetical protein (392 aa)
PST130_1142_1							14765	2e-09	hypothetical protein similar to reverse transcriptase/ribonuclease H (481 aa)
PST130_11420_2							19814	7e-39	predicted protein (308 aa)
PST130_11420_4
PST130_11425_1							12010	4e-08	predicted protein (599 aa)
PST130_11426_2	PF00012.14	HSP70	4.8e-13				6075	3e-35	heat shock protein Hsp88 (784 aa)
PST130_11426_3
PST130_11427_1						GH737397.1	10077	1e-58	hypothetical protein (627 aa)
PST130_11428_2							15356	2e-125	predicted protein (835 aa)
PST130_11428_3							11176	4e-26	predicted protein (874 aa)
PST130_11429_2							9437	1e-19	predicted protein (277 aa)
PST130_11432_1
PST130_11432_2	PF02358.10	Trehalose_PPase	2.2e-09				2056	9e-17	predicted protein (359 aa)
PST130_11434_1
PST130_11434_3	PF02992.8	Transposase_21	7e-17				16880	9e-90	predicted protein (937 aa)
PST130_11436_2							2515	2e-07	hypothetical protein (594 aa)
PST130_11437_2							12942	3e-114	predicted protein (454 aa)
PST130_11438_1							3809	3e-42	predicted protein (331 aa)
PST130_11438_3
PST130_11441_1							17001	0	predicted protein (879 aa)
PST130_11442_1							18239	4e-145	predicted protein (640 aa)
PST130_11444_2							18763	9e-38	predicted protein (354 aa)
PST130_11444_3
PST130_11444_4	PF12937.1	F-box-like	0.0097				18750	9e-144	predicted protein (571 aa)
PST130_11444_5							18750	7e-149	predicted protein (571 aa)
PST130_11444_7							6565	3e-24	predicted protein (547 aa)
PST130_11447_2							14128	0	predicted protein (953 aa)
PST130_11448_1	PF05699.8	Dimer_Tnp_hAT	4.4e-12				685	1e-124	predicted protein (822 aa)
PST130_11451_1							13345	6e-49	nicotinate phosphoribosyltransferase (445 aa)
PST130_11451_3
PST130_11451_5	PF00135.22	COesterase	5.2e-53				13346	7e-92	hypothetical protein similar to sterol esterase precursor (293 aa)
PST130_11452_1
PST130_11452_2
PST130_11454_1							9384	4e-55	glucan 1,3-beta-glucosidase precursor (760 aa)
PST130_11455_1	PF00076.16	RRM_1	1.7e-05	GO:0008150 GO:0016740 GO:0051276 GO:0005634	set1_schpo ame: full=histone-lysine n- h3 lysine-4 specific ame: full=compass component set1 ame: full=lysine n-methyltransferase 2 ame: full=set domain-containing protein 1 ame: full=set1 complex component set1 short=set1c component set1 ame: full=spset1		1931	2e-106	predicted protein (401 aa)
PST130_11458_1							7298	5e-27	predicted protein (973 aa)
PST130_11459_1							4340	4e-22	predicted protein (310 aa)
PST130_11460_1							10261	2e-102	predicted protein (1179 aa)
PST130_11460_2
PST130_11460_5
PST130_11461_1						GH738158.1	14915	1e-45	predicted protein (861 aa)
PST130_11462_1							14095	2e-41	predicted protein (535 aa)
PST130_11465_2	PF01812.14	5-FTHF_cyc-lig	7e-05				16449	9e-23	hypothetical protein (269 aa)
PST130_11466_3
PST130_11468_2	PF12861.1	zf-Apc11	9.3e-16
PST130_11470_1	PF01490.12	Aa_trans	4.4e-27				2968	3e-60	hypothetical protein similar to transporter (535 aa)
PST130_11470_3
PST130_11470_6							19280	2e-21	hypothetical protein (381 aa)
PST130_11470_7							2972	7e-37	conserved hypothetical protein (337 aa)
PST130_11471_1	PF04859.6	DUF641	0.001				4013	2e-82	hypothetical protein (1856 aa)
PST130_11472_1	PF00266.1	Aminotran_5	2.6e-06				9358	3e-83	molybdenum cofactor sulfurase (538 aa)
PST130_11472_3	PF01231.12	IDO	5.8e-72				9355	3e-148	indoleamine 2,3-dioxygenase family protein (583 aa)
PST130_11473_7
PST130_11473_9							3371	6e-14	predicted protein (348 aa)
PST130_11476_2							8946	1e-06	predicted protein (154 aa)
PST130_1148_1	PF00043.19	GST_C	0.00031
PST130_11480_3
PST130_11480_4	PF00098.17	zf-CCHC	0.0012				1711	1e-56	predicted protein (534 aa)
PST130_11481_2	PF00270.23	DEAD	7.2e-06				8980	2e-82	ATP-dependent DNA helicase recQ (607 aa)
PST130_11481_3							19169	3e-06	predicted protein (392 aa)
PST130_11482_2	PF05699.8	Dimer_Tnp_hAT	4.8e-06				13559	4e-29	predicted protein (744 aa)
PST130_11483_1	PF00488.15	MutS_V	3.5e-67	GO:0003677	mating-type switching protein swi4		2803	3e-99	mating-type switching protein swi4 (1186 aa)
PST130_11483_2	PF05192.12	MutS_III	0.00024				2803	2e-64	mating-type switching protein swi4 (1186 aa)
PST130_11483_3	PF01624.14	MutS_I	6.6e-15				2803	2e-114	mating-type switching protein swi4 (1186 aa)
PST130_11484_1	PF00036.26	efhand	2e-07	GO:0003674	neuronal calcium sensor 1		9250	1e-79	neuronal calcium sensor 1 (191 aa)
PST130_11485_3
PST130_11485_4
PST130_11487_1							1668	2e-170	conserved hypothetical protein (970 aa)
PST130_11488_1							17560	2e-13	predicted protein (122 aa)
PST130_11488_2
PST130_11491_3							14682	6e-13	predicted protein (116 aa)
PST130_11492_1							4050	4e-19	predicted protein (836 aa)
PST130_11492_2							15047	3e-28	predicted protein (271 aa)
PST130_11492_3							6915	3e-06	predicted protein (612 aa)
PST130_11493_1							5479	9e-56	hypothetical protein (563 aa)
PST130_11494_1							14344	0	hypothetical protein similar to translation repressor (1512 aa)
PST130_11495_1	PF00176.17	SNF2_N	2.8e-44				11636	3e-66	DNA repair protein rad5 (440 aa)
PST130_11495_2							19523	4e-161	predicted protein (350 aa)
PST130_115_1							9307	8e-32	hypothetical protein (774 aa)
PST130_1150_1
PST130_11500_1							15357	1e-56	predicted protein (776 aa)
PST130_11502_1							8539	4e-102	predicted protein (526 aa)
PST130_11503_1							19609	2e-42	predicted protein (742 aa)
PST130_11504_2							19566	9e-09	predicted protein (222 aa)
PST130_11506_1							5656	2e-91	predicted protein (846 aa)
PST130_11506_3	PF01698.10	FLO_LFY	0.0057
PST130_11507_1	PF04192.6	Utp21	1.5e-22	GO:0005856 GO:0005737 GO:0005634 GO:0005575	wd repeat-containing protein 36		10670	0	WD repeat-containing protein 36 (1007 aa)
PST130_11507_2
PST130_11508_1							15125	5e-47	predicted protein (589 aa)
PST130_11508_2							906	3e-06	predicted protein (123 aa)
PST130_11510_1							4171	4e-162	predicted protein (944 aa)
PST130_11512_4	PF00503.14	G-alpha	4.8e-12	GO:0005515 GO:0008150 GO:0005575 GO:0042221 GO:0006810 GO:0005624 GO:0007165 GO:0006950 GO:0003674 GO:0005886	guanine nucleotide-binding protein subunit alpha		17044	2e-26	guanine nucleotide-binding protein subunit alpha (350 aa)
PST130_11512_5
PST130_11514_1				GO:0007165 GO:0030234 GO:0005575	ras gtpase-activating protein		6199	9e-37	hypothetical protein similar to ras GTPase-activating protein (878 aa)
PST130_11514_2							6200	1e-24	predicted protein (155 aa)
PST130_11514_4	PF06795.5	Erythrovirus_X	0.0028
PST130_11515_1	PF12949.1	HeH	0.0012				2453	3e-34	predicted protein (1624 aa)
PST130_11516_2							5891	7e-63	hypothetical protein (377 aa)
PST130_11517_1
PST130_11517_2	PF00400.26	WD40	3.5e-09				9659	0	hypothetical protein similar to Ciao1-PA (463 aa)
PST130_11518_1	PF03097.12	BRO1	2.2e-09				14868	3e-101	hypothetical protein (442 aa)
PST130_11519_1
PST130_11519_2							7254	6e-16	predicted protein (492 aa)
PST130_11519_3							13493	2e-09	predicted protein (169 aa)
PST130_11520_1							9742	3e-32	predicted protein (945 aa)
PST130_11523_2
PST130_11523_5
PST130_11524_2							10571	1e-34	predicted protein (541 aa)
PST130_11525_2							4887	3e-26	predicted protein (220 aa)
PST130_11526_2							240	8e-09	predicted protein (104 aa)
PST130_11527_3
PST130_11528_3
PST130_11529_2							15217	3e-33	predicted protein (107 aa)
PST130_1153_1							6673	0	pre-mRNA-splicing factor SYF1 (1075 aa)
PST130_1153_2	PF01336.19	tRNA_anti	2.2e-05	GO:0008150	aspartate-trna ligase		6672	1e-80	aspartate-tRNA ligase (583 aa)
PST130_11530_1							8222	4e-25	hypothetical protein (195 aa)
PST130_11531_1							13185	1e-13	predicted protein (905 aa)
PST130_11532_1
PST130_11532_4							12136	8e-08	predicted protein (245 aa)
PST130_11534_1	PF03184.13	DDE_1	6.1e-18				15630	0	hypothetical protein (750 aa)
PST130_11535_1
PST130_11536_3							1322	2e-19	predicted protein (544 aa)
PST130_11539_1	PF02771.10	Acyl-CoA_dh_N	0.0041				5200	2e-82	hypothetical protein similar to acyl CoA dehydrogenase (440 aa)
PST130_11540_1	PF01728.13	FtsJ	2.6e-52	GO:0016070 GO:0042254 GO:0008150 GO:0016740 GO:0005634	et-dependent rrna methyltransferase spb1		7793	0	AdoMet-dependent rRNA methyltransferase SPB1 (893 aa)
PST130_11543_2	PF09286.5	Pro-kuma_activ	9.6e-30	GO:0016787	fused2 protease		15038	0	hypothetical protein similar to fuSed2 protease (658 aa)
PST130_11543_4	PF00270.23	DEAD	4.7e-11				15039	5e-166	ATP-dependent DNA helicase Q1 (759 aa)
PST130_11544_1							20516	2e-13	predicted protein (603 aa)
PST130_11546_1	PF00450.16	Peptidase_S10	1.8e-10				14432	3e-36	hypothetical protein (489 aa)
PST130_11548_1							903	1e-12	predicted protein (1068 aa)
PST130_11548_2
PST130_1155_1							19697	4e-38	predicted protein (411 aa)
PST130_11550_1	PF00155.15	Aminotran_1_2	5.5e-57	GO:0003674 GO:0006519 GO:0008150 GO:0016740	aspartate aminotransferase		13064	4e-127	aspartate aminotransferase, mitochondrial precursor (429 aa)
PST130_11551_1							16726	1e-52	hypothetical protein (596 aa)
PST130_11552_1
PST130_11552_2
PST130_11554_3
PST130_11554_4							8393	2e-57	predicted protein (187 aa)
PST130_11554_5
PST130_11555_2	PF08238.6	Sel1	2.5e-07				767	2e-65	conserved hypothetical protein (823 aa)
PST130_11557_4	PF10273.3	WGG	5.4e-08				6497	2e-67	hypothetical protein (216 aa)
PST130_11558_1	PF02992.8	Transposase_21	6.7e-07				19123	1e-133	predicted protein (1089 aa)
PST130_11558_3							12388	9e-12	predicted protein (285 aa)
PST130_11558_4
PST130_11559_1							9341	2e-96	conserved hypothetical protein (587 aa)
PST130_11559_2	PF03901.11	Glyco_transf_22	6e-82				9335	0	hypothetical protein similar to DIBD1 (722 aa)
PST130_1156_1
PST130_11560_5
PST130_11561_1							10165	7e-77	hypothetical protein (237 aa)
PST130_11562_2	PF01545.15	Cation_efflux	1.3e-50
PST130_11563_1
PST130_11563_2	PF02076.9	STE3	3.5e-09				333	2e-80	conserved hypothetical protein (372 aa)
PST130_11563_3	PF10587.3	EF-1_beta_acid	1.6e-11	GO:0006412 GO:0005737	elongation factor 1-beta		332	2e-86	elongation factor 1-beta (225 aa)
PST130_11564_2	PF00339.23	Arrestin_N	0.00016
PST130_11564_4
PST130_11565_2				GO:0003674	dna repair protein		17071	1e-111	conserved hypothetical protein (2164 aa)
PST130_11566_1							5626	3e-22	predicted protein (1088 aa)
PST130_11568_1						GH737526.1
PST130_11569_2	PF03205.8	MobB	0.0017				12965	0	hypothetical protein similar to GTP binding protein (1172 aa)
PST130_11569_4
PST130_11570_1	PF01453.18	B_lectin	0.00035				18184	0	hypothetical protein (676 aa)
PST130_11571_1							4771	2e-14	predicted protein (1343 aa)
PST130_11571_2							12040	4e-52	predicted protein (408 aa)
PST130_11574_2
PST130_11574_3	PF05699.8	Dimer_Tnp_hAT	0.0054				13559	3e-28	predicted protein (744 aa)
PST130_11576_1							10272	1e-33	conserved hypothetical protein (321 aa)
PST130_11576_2	PF00622.22	SPRY	8.3e-19				10273	1e-129	hypothetical protein similar to SPRY domain-containing protein (607 aa)
PST130_11577_3
PST130_11579_2	PF00155.15	Aminotran_1_2	1.8e-59	GO:0003674 GO:0006519 GO:0008150 GO:0016740	aspartate aminotransferase		10702	3e-150	aspartate aminotransferase (418 aa)
PST130_11580_1
PST130_11581_1
PST130_11581_2
PST130_11581_3
PST130_11582_1	PF01083.16	Cutinase	5.7e-26				13693	3e-76	predicted protein (359 aa)
PST130_11582_2	PF00271.25	Helicase_C	3.1e-09				13694	0	hypothetical protein similar to helicase domain-containing protein (1710 aa)
PST130_11582_3
PST130_11583_1	PF00025.15	Arf	4.8e-08				1443	7e-20	ADP-ribosylation factor (2689 aa)
PST130_11583_3	PF01585.17	G-patch	0.0092				1444	1e-57	hypothetical protein (274 aa)
PST130_11584_2				GO:0016020 GO:0012505 GO:0005783 GO:0044255 GO:0006464 GO:0016740	gpi-anchored wall transfer protein 1		5770	9e-18	GPI-anchored wall transfer protein 1 (454 aa)
PST130_11585_1
PST130_11585_2	PF01090.13	Ribosomal_S19e	3e-56	GO:0005840 GO:0005198 GO:0006412	40s ribosomal protein s19		5794	3e-81	40S ribosomal protein S19-2 (151 aa)
PST130_11585_3	PF00717.17	Peptidase_S24	8.3e-09				19819	2e-46	hypothetical protein similar to mitochondrial inner membrane peptidase complex catalytic subunit (267 aa)
PST130_11586_1	PF12706.1	Lactamase_B_2	8.9e-05	GO:0016070 GO:0003674 GO:0016787 GO:0005634 GO:0005737	endoribonuclease ysh1		1491	0	endoribonuclease YSH1 (795 aa)
PST130_11589_1							1633	6e-83	meiotically up-regulated gene 190 protein (1127 aa)
PST130_1159_1	PF02463.13	SMC_N	0.0019	GO:0006810 GO:0006950 GO:0006259 GO:0042221 GO:0016020 GO:0005634 GO:0005215 GO:0003674	dna repair protein rad50		4094	4e-26	DNA repair protein RAD50 (1292 aa)
PST130_1159_2	PF04156.8	IncA	0.00088				4094	8e-83	DNA repair protein RAD50 (1292 aa)
PST130_11590_2
PST130_11591_4	PF04758.8	Ribosomal_S30	4e-23	GO:0005840 GO:0005198 GO:0006412	ribosomal small		14686	5e-32	hypothetical protein (67 aa)
PST130_11592_1
PST130_11593_1	PF00704.22	Glyco_hydro_18	0.0065				3204	1e-122	hypothetical protein similar to B-(1-6) glucan synthase (408 aa)
PST130_11593_2	PF02893.14	GRAM	3.2e-07	GO:0016740 GO:0008150	sterol 3-beta-glucosyltransferase		3199	0	hypothetical protein similar to sterol 3-beta-glucosyltransferase (1515 aa)
PST130_11594_1	PF01343.12	Peptidase_S49	2.8e-12				11229	0	hypothetical protein similar to protease IV (564 aa)
PST130_11594_2	PF00967.11	Barwin	0.00062				11233	1e-90	predicted protein (255 aa)
PST130_11594_5							15563	0	conserved hypothetical protein (885 aa)
PST130_11594_6							11233	2e-84	predicted protein (255 aa)
PST130_11597_1							4171	6e-175	predicted protein (944 aa)
PST130_11598_1	PF01527.14	HTH_Tnp_1	0.0089			GH737387.1	6727	1e-40	predicted protein (207 aa)
PST130_11600_3							2823	2e-09	predicted protein (533 aa)
PST130_11602_1
PST130_11603_2							8039	2e-28	predicted protein (373 aa)
PST130_11604_1	PF00122.14	E1-E2_ATPase	1.5e-49	GO:0008150 GO:0016020 GO:0016787 GO:0005215 GO:0046483 GO:0003674 GO:0006810	plasma membrane atpase 1		6276	0	plasma membrane ATPase 1 (977 aa)
PST130_11604_2
PST130_11605_1	PF00076.16	RRM_1	1.7e-16				837	9e-116	hypothetical protein (332 aa)
PST130_11606_1							16897	2e-54	predicted protein (614 aa)
PST130_11608_1
PST130_11610_2							11195	2e-06	predicted protein (609 aa)
PST130_11613_10							15244	1e-06	hypothetical protein (845 aa)
PST130_11613_3							14549	1e-19	predicted protein (911 aa)
PST130_11613_5
PST130_11613_8
PST130_11614_1	PF00999.15	Na_H_Exchanger	6.3e-41	GO:0006810	na(+) h(+) antiporter 1		17192	1e-155	Na(+)/H(+) antiporter 1 (1079 aa)
PST130_11616_2	PF00957.15	Synaptobrevin	6.8e-14	GO:0016020 GO:0006810	snare ykt6		4325	3e-106	hypothetical protein similar to SNARE Ykt6 (208 aa)
PST130_11619_1
PST130_11619_2
PST130_11620_1	PF12937.1	F-box-like	1.3e-08				9847	2e-32	predicted protein (441 aa)
PST130_11620_2	PF12937.1	F-box-like	3e-07				17969	1e-44	hypothetical protein (394 aa)
PST130_11620_5							17969	1e-09	hypothetical protein (394 aa)
PST130_11623_1							3328	2e-08	dynactin subunit 4 (644 aa)
PST130_11624_1	PF05285.6	SDA1	6.1e-38				15066	2e-85	hypothetical protein similar to SDA1 family protein (883 aa)
PST130_11624_3
PST130_11624_6							15063	2e-64	predicted protein (283 aa)
PST130_11624_8							15062	1e-77	predicted protein (307 aa)
PST130_11625_1							9878	5e-07	conserved hypothetical protein (181 aa)
PST130_11626_1
PST130_11627_1
PST130_11628_1							18523	0	predicted protein (985 aa)
PST130_11629_1	PF05804.6	KAP	0.0002	GO:0003674 GO:0016740	ste ste11 cdc15 protein kinase		5368	0	septation protein (1481 aa)
PST130_1163_1	PF02878.10	PGM_PMM_I	4.8e-17	GO:0016853 GO:0008150 GO:0003674	phosphoglucomutase [Puccinia graminis f. sp. tritici CRL 75-36-700-3]		6082	6e-52	phosphoglucomutase (562 aa)
PST130_11630_2	PF01207.11	Dus	2e-36	GO:0005634 GO:0003674 GO:0016070	up-regulated in lung cancer 8		141	6e-99	hypothetical protein similar to up-regulated in lung cancer 8 (465 aa)
PST130_11631_1							16686	2e-109	sortilin precursor (1565 aa)
PST130_11631_3							16685	1e-12	hypothetical protein (103 aa)
PST130_11632_1
PST130_11633_1				GO:0016787	trna-intron endonuclease		8763	9e-73	conserved hypothetical protein (400 aa)
PST130_11635_1							1239	9e-63	predicted protein (621 aa)
PST130_11635_2	PF02269.10	TFIID-18kDa	1.3e-28				1232	2e-167	protein SPT3 (426 aa)
PST130_11636_2							14573	5e-112	hypothetical protein (710 aa)
PST130_11638_1	PF04059.6	RRM_2	5.2e-32	GO:0007126 GO:0003723 GO:0005515 GO:0005634 GO:0005737	meiosis protein mei2		8587	8e-128	hypothetical protein (876 aa)
PST130_11639_2							2006	2e-19	predicted protein (770 aa)
PST130_1164_1	PF00098.17	zf-CCHC	6.4e-05			GH737439.1	7999	5e-12	predicted protein (480 aa)
PST130_11641_1	PF12753.1	Nro1	0.0031				11287	1e-46	hypothetical protein (423 aa)
PST130_11641_2							11286	5e-130	predicted protein (373 aa)
PST130_11642_1
PST130_11643_1	PF00071.16	Ras	0.00021	GO:0003674	hypothetical protein PGTG_01951 [Puccinia graminis f. sp. tritici CRL 75-36-700-3]		1951	8e-50	GTP-binding protein ypt4 (239 aa)
PST130_11643_2	PF12828.1	PXB	1.1e-31				1952	0	hypothetical protein similar to PX domain-containing protein (1000 aa)
PST130_11646_3
PST130_11647_1
PST130_11647_2							15021	2e-78	predicted protein (434 aa)
PST130_11650_1							7926	0	hypothetical protein similar to beta-mannosidase (517 aa)
PST130_11654_1	PF04147.6	Nop14	0.0062				5099	2e-19	conserved hypothetical protein (486 aa)
PST130_11655_1							13080	7e-19	predicted protein (849 aa)
PST130_11656_1
PST130_11657_1	PF01722.12	BolA	3.5e-12				6557	6e-25	predicted protein (147 aa)
PST130_11658_2						GH738368.1	6990	4e-10	predicted protein (128 aa)
PST130_11659_2							17213	9e-20	predicted protein (183 aa)
[truncated: 18,424 more rows]
