# Supplementary material for: Next Generation Sequencing Provides Rapid Access to the Genome of Puccinia striiformis f. sp. tritici, the Causal Agent of Wheat Stripe Rust
Source: PLOS journal article supplement (doi:10.1371/journal.pone.0024230), 2011-08-31
Supplement: S3 (10.1371/journal.pone.0024230.s003) [file journal.pone.0024230.s003]

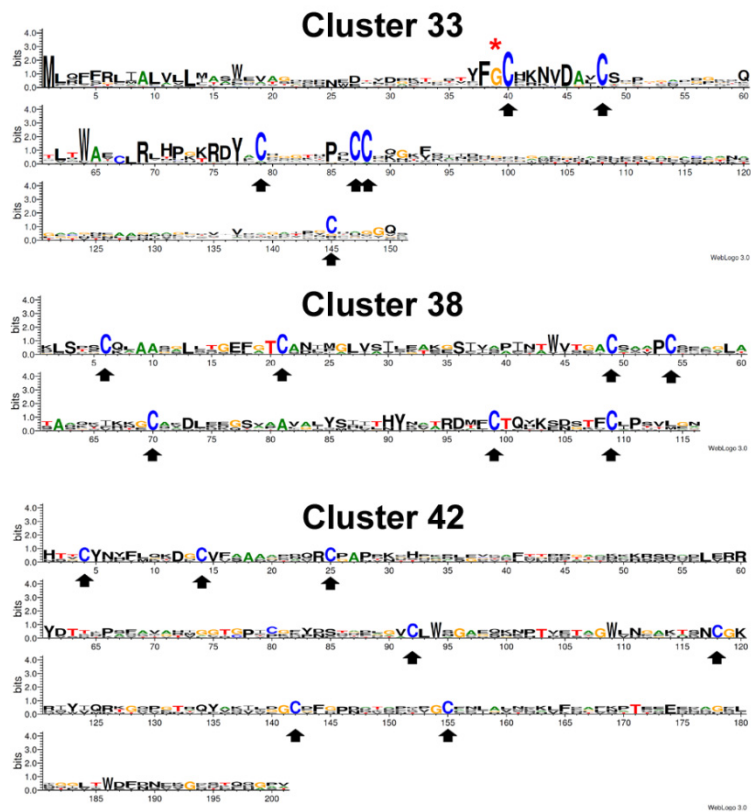

**Figure S3** - Conservation profile for the three largest families of putative effector proteins.

The 1,088 PST-130 putative effectors were grouped by similarity (BLASTP,  $E\text{-value} \leq e^{-10}$ ; Supplementary material S5). Cluster 33, 38 and 42 were the largest clusters with 16, 11 and 8 members, respectively. Sequences were aligned and analyzed with Web Logo (<http://weblogo.berkeley.edu/>). Arrows indicate the conserved cysteine residues and the asterisk in cluster 33 indicates the conserved FxC motif.
