# Supplementary material for: Next Generation Sequencing Provides Rapid Access to the Genome of Puccinia striiformis f. sp. tritici, the Causal Agent of Wheat Stripe Rust
Source: PLOS journal article supplement (doi:10.1371/journal.pone.0024230), 2011-08-31
Supplement: S5 (10.1371/journal.pone.0024230.s005) [file journal.pone.0024230.s005]

**Table S2** – Manual curation of genes based on comparison between PST-130 and PGTG.

| PST-130                      |              |                         |                                                                                                             | PGTG                         |                         |                                                                                                |
|------------------------------|--------------|-------------------------|-------------------------------------------------------------------------------------------------------------|------------------------------|-------------------------|------------------------------------------------------------------------------------------------|
| PST gene <sup>a</sup>        | No. of exons | Wrongly annotated exons | Errors found                                                                                                | PGTG gene <sup>b</sup>       | Wrongly annotated exons | Errors found                                                                                   |
| PST130_8439_6<br>(HQ698552)  | 4            | 4                       | Missing exon 1, truncated exon 4 , and non-existent exons 5 and 6.                                          | PGTG_06567.2                 | 3                       | Incorrect end of exon 4, and 2 non-existent exons in intergenic region. Merged with next gene. |
| PST130_14418_3<br>(HQ698553) | 3            | 0                       | -                                                                                                           | PGTG_15040.2                 | 1                       | Incorrect start of exon 3.                                                                     |
| PST130_21324_2<br>(HQ698554) | 6            | 1                       | Extra exon at N terminus.                                                                                   | PGTG_07202.2                 | 1                       | Incorrect exon 3, missing sequence.                                                            |
| PST130_15230_2<br>(HQ698555) | 8            | 1                       | Last exon is incorrect.                                                                                     | PGTG_13421.2                 | 0                       | -                                                                                              |
| PST130_7328_3<br>(HQ698556)  | 5            | 0                       | -                                                                                                           | PGTG_12324.2                 | 0                       | -                                                                                              |
| PST130_8439_8<br>(HQ698557)  | 2            | 2                       | Missing exon 1, incorrect start exon 2 and addition of an incorrect intron.                                 | PGTG_06567.2                 | 2                       | Missing exon 1, early start of exon 2, merged with previous gene.                              |
| PST130_10010_2<br>(HQ698558) | 8            | 3                       | Early start of exon 6.                                                                                      | PGTG_05076.2                 | 0                       | -                                                                                              |
| PST130_10079_1<br>(HQ698559) | 9            | 3                       | Incorrect end of exon 1, start of exon 2 and end of exon 3.                                                 | PGTG_14939.2                 | 0                       | -                                                                                              |
| PST130_10115_3<br>(HQ698560) | 3            | 0                       | -                                                                                                           | PGTG_13013.2                 | 0                       | -                                                                                              |
| PST130_10098_3<br>(HQ698561) | 2            | 0                       | -                                                                                                           | PGTG_02106.2                 | 0                       | -                                                                                              |
| PST130_7733_4<br>(JN033203)  | 5            | 5                       | Incorrect start codon and start of exon 2, retention of intron with stop codon and loss of exon 3, 4 and 5. | PGTG_11438.2<br>PGTG_11439.2 | 3                       | ORF was identified as two separate coding sequences.                                           |
| PST130_11019_1               | 11           | 6                       | Missing part of exon 1 because on border of contig. Incorrect start of exon 2,8,9                           | PGTG_17808.2                 | 2                       | Missing exon 4 and incorrect start of exon 5.                                                  |

|                               |    |   |                                                                                                                                                     |              |   |                                                                                                                  |
|-------------------------------|----|---|-----------------------------------------------------------------------------------------------------------------------------------------------------|--------------|---|------------------------------------------------------------------------------------------------------------------|
|                               |    |   | and incorrect end of exon 8. Wrong stop codon.                                                                                                      |              |   |                                                                                                                  |
| PST130_17625_16<br>(JN033204) | 7  | 3 | Incorrect start codon. Incorrect end of exon 1, 2, 7. Incorrect stop codon.                                                                         | PGTG_08907.2 | 1 | Incorrect end of exon 5 with retention of entire intron.                                                         |
| PST130_7711_7<br>(JN033205)   | 4  | 0 | -                                                                                                                                                   | PGTG_00569.2 | 0 | -                                                                                                                |
| PST130_7192_3<br>(JN033206)   | 17 | 3 | Incorrect start codon. Incorrect start of exon 1, 3 and incorrect end of exon 4.                                                                    | PGTG_12360.2 | 3 | Incorrect start codon. Incorrect start of exon 15. Incorrect end of exon 13.                                     |
| PST130_9446_5<br>(JN033207)   | 5  | 3 | Incorrect start codon results in loss of exon 1,2 and incorrect start of exon 3.                                                                    | PGTG_07027.2 | 0 | -                                                                                                                |
| PST130_7851_3<br>(JN033208)   | 4  | 1 | Incorrect start of exon 3.                                                                                                                          | PGTG_02889.2 | 3 | Incorrect start codon. Incorrect end of exon 3 result in retention of stop codon with consequent loss of exon 4. |
| PST130_13665_1<br>(JN033209)  | 4  | 2 | Incorrect start codon and start of exon 2. Missing exon 13. Incorrect end of exon 19 results in incorrect stop codon and loss of exon 20,21 and 22. | PGTG_14396.2 | 0 | -                                                                                                                |
| PST130_9763_2<br>(JN033210)   | 22 | 5 |                                                                                                                                                     | PGTG_11327.2 | 0 | -                                                                                                                |
| PST130_7471_3<br>(JN033211)   | 10 | 3 | Incorrect start of exon 2. Missing exon 7. Incorrect end of exon 10.                                                                                | PGTG_19538.2 | 2 | Incorrect start of exon 8 and incorrect end of exon 10.                                                          |

<sup>a</sup> PST gene names as in Supplementary material S3. In parenthesis GenBank accession numbers. Sequence of PST130\_11019\_1 is incomplete because on the edge of contig and was not deposited to GenBank.

<sup>b</sup> PGTG gene names as assigned in [5].
